# Supplementary material for: Introduction of substituents for tuning the redox properties of benzoate-bridged paddlewheel diruthenium( ii , ii ) complexes: what does the OH group bring?
Source: Royal Society of Chemistry journal article supplement (doi:10.1039/d4dt03020f), 2024-12-11
Supplement: d4dt03020f1.pdf [file d4dt03020f1.pdf]

## Supplementary Information

### **Introduction of substituents for tuning the redox properties of benzoate-bridged paddlewheel diruthenium(II, II) complexes: What does the OH group bring?**

Wataru Kosaka,<sup>a,b</sup> Yudai Watanabe,<sup>b</sup> Taku Kitayama,<sup>b</sup> Chisa Itoh,<sup>b</sup> and Hitoshi Miyasaka,<sup>\*a,b</sup>

<sup>a</sup> Institute for Materials Research, Tohoku University, 2-1-1 Katahira, Aoba-ku, Sendai 980-8577, Japan

<sup>b</sup> Department of Chemistry, Graduate School of Science, Tohoku University, 6-3 Aramaki-Aza-Aoba, Aoba-ku, Sendai 980-8578, Japan

Corresponding author\*

Prof. Dr. Hitoshi Miyasaka

Institute for Materials Research

Tohoku University

2-1-1 Katahira, Aoba-ku, Sendai, Miyagi 980-8577, Japan

E-mail: [hitoshi.miyasaka.e7@tohoku.ac.jp](mailto:hitoshi.miyasaka.e7@tohoku.ac.jp)

Tel: +81-22-215-2030

FAX: +81-22-215-2031

## ■ Contents for SI

|                                                                                                                                                                   |     |
|-------------------------------------------------------------------------------------------------------------------------------------------------------------------|-----|
| <b>Contents for SI</b>                                                                                                                                            | S2  |
| <b>Table S1.</b> Crystallographic data                                                                                                                            | S3  |
| <b>Table S2.</b> Magnetic parameters                                                                                                                              | S6  |
| <b>Fig. S1.</b> Temperature dependence of $\chi$ and $\chi T$                                                                                                     | S7  |
| <b>Fig. S2.</b> ORTEP drawings                                                                                                                                    | S10 |
| <b>Fig. S3.</b> Molecular structures focused on intermolecular hydrogen bond                                                                                      | S11 |
| <b>Fig. S4.</b> Molecular structures focused on intermolecular hydrogen bond                                                                                      | S12 |
| <b>Determination of Hammett constants for <i>ortho</i>-substituents</b>                                                                                           | S13 |
| <b>Table S3.</b> Electrochemical data and the HOMO level of reported $[\text{Ru}_2(\text{R}_n\text{ArCO}_2)_4(\text{THF})_2]$                                     | S14 |
| <b>Table S4.</b> Electrochemical data and the HOMO level of reported $[\text{Ru}_2(2,6-(\text{CF}_3)_2\text{ArCO}_2)_2(\text{R}_n\text{ArCO}_2)_2(\text{THF})_2]$ | S15 |
| <b>Fig. S5.</b> Plot of half-wave redox potential ( $E_{1/2}$ ) vs. $\text{p}K_a$ including mono-Cl series                                                        | S16 |
| <b>Table. S5.</b> Estimated energy levels of $\pi^*$ - and $\delta^*$ -characteristic orbitals                                                                    | S17 |
| <b>Fig. S6.</b> Frontier orbitals associated with $\pi^*$ and $\delta^*$ orbitals                                                                                 | S18 |
| <b>Table S6.</b> Estimated energy levels for the hypothetical structural model                                                                                    | S26 |
| <b>Fig. S7.</b> Energy diagrams of frontier orbitals associated with $\pi^*$ and $\delta^*$ orbitals and Mulliken charge                                          | S27 |
| <b>References for SI</b>                                                                                                                                          | S34 |

**Table S1.** Crystallographic Data.

|                                                         | <b>2Cl4OH·2THF</b>                                                              | <b>3F4OH·4THF</b>                                                              | <b>3Cl4OH·2THF</b>                                                              | <b>3Br4OH·4THF</b>                                                              | <b>3F2OH</b>                                                                   | <b>4F2OH</b>                                                                   |
|---------------------------------------------------------|---------------------------------------------------------------------------------|--------------------------------------------------------------------------------|---------------------------------------------------------------------------------|---------------------------------------------------------------------------------|--------------------------------------------------------------------------------|--------------------------------------------------------------------------------|
| formula                                                 | C <sub>44</sub> H <sub>48</sub> Cl <sub>4</sub> O <sub>16</sub> Ru <sub>2</sub> | C <sub>52</sub> H <sub>64</sub> F <sub>4</sub> O <sub>18</sub> Ru <sub>2</sub> | C <sub>44</sub> H <sub>48</sub> Cl <sub>4</sub> O <sub>16</sub> Ru <sub>2</sub> | C <sub>53</sub> H <sub>64</sub> Br <sub>4</sub> O <sub>18</sub> Ru <sub>2</sub> | C <sub>36</sub> H <sub>32</sub> F <sub>4</sub> O <sub>14</sub> Ru <sub>2</sub> | C <sub>36</sub> H <sub>32</sub> F <sub>4</sub> O <sub>14</sub> Ru <sub>2</sub> |
| formula weight                                          | 1176.76                                                                         | 1255.17                                                                        | 1176.76                                                                         | 1498.81                                                                         | 966.75                                                                         | 966.75                                                                         |
| crystal system                                          | monoclinic                                                                      | orthorhombic                                                                   | monoclinic                                                                      | orthorhombic                                                                    | triclinic                                                                      | monoclinic                                                                     |
| space group                                             | <i>P2<sub>1</sub>/c</i>                                                         | <i>Pbca</i>                                                                    | <i>P2<sub>1</sub>/n</i>                                                         | <i>Pbca</i>                                                                     | <i>P-1</i>                                                                     | <i>P2<sub>1</sub>/c</i>                                                        |
| <i>a</i> / Å                                            | 13.7138(13)                                                                     | 14.2350(4)                                                                     | 13.9686(4)                                                                      | 17.0102(6)                                                                      | 8.0723(5)                                                                      | 9.4838(5)                                                                      |
| <i>b</i> / Å                                            | 19.4669(11)                                                                     | 18.3819(5)                                                                     | 10.5955(3)                                                                      | 18.1666(4)                                                                      | 10.5927(9)                                                                     | 19.1954(10)                                                                    |
| <i>c</i> / Å                                            | 8.4058(9)                                                                       | 20.2770(6)                                                                     | 15.9363(6)                                                                      | 18.4141(5)                                                                      | 11.6969(6)                                                                     | 10.1612(5)                                                                     |
| <i>α</i> / deg                                          | 90                                                                              | 90                                                                             | 90                                                                              | 90                                                                              | 86.587(6)                                                                      | 90                                                                             |
| <i>β</i> / deg                                          | 91.348(9)                                                                       | 90                                                                             | 93.675(3)                                                                       | 90                                                                              | 78.313(5)                                                                      | 103.587(6)                                                                     |
| <i>γ</i> / deg                                          | 90                                                                              | 90                                                                             | 90                                                                              | 90                                                                              | 70.144(7)                                                                      | 90                                                                             |
| <i>V</i> / Å <sup>3</sup>                               | 2243.4(3)                                                                       | 5305.8(3)                                                                      | 2353.79(13)                                                                     | 5690.3(3)                                                                       | 921.16(12)                                                                     | 1798.03(17)                                                                    |
| <i>Z</i>                                                | 2                                                                               | 4                                                                              | 2                                                                               | 4                                                                               | 1                                                                              | 2                                                                              |
| crystal size / mm <sup>3</sup>                          | 0.06×0.13×0.15                                                                  | 0.09×0.12×0.12                                                                 | 0.03×0.12×0.27                                                                  | 0.15×0.24×0.27                                                                  | 0.02×0.07×0.17                                                                 | 0.18×0.17×0.02                                                                 |
| <i>T</i> / K                                            | 98(1)                                                                           | 93(1)                                                                          | 93(1)                                                                           | 102(1)                                                                          | 102(1)                                                                         | 102(1)                                                                         |
| <i>D</i> <sub>calc</sub> / g·cm <sup>-3</sup>           | 1.742                                                                           | 1.571                                                                          | 1.660                                                                           | 1.750                                                                           | 1.743                                                                          | 1.786                                                                          |
| <i>F</i> <sub>000</sub>                                 | 1192.00                                                                         | 2576.00                                                                        | 1192.00                                                                         | 2992.00                                                                         | 484.00                                                                         | 968.00                                                                         |
| <i>λ</i> / Å                                            | 0.71073                                                                         | 0.71073                                                                        | 0.71073                                                                         | 0.71073                                                                         | 0.71073                                                                        | 0.71073                                                                        |
| <i>μ</i> (Mo Kα) / cm <sup>-1</sup>                     | 9.850                                                                           | 6.570                                                                          | 9.390                                                                           | 34.100                                                                          | 9.090                                                                          | 9.320                                                                          |
| data measured                                           | 18257                                                                           | 42242                                                                          | 18554                                                                           | 44345                                                                           | 8509                                                                           | 11341                                                                          |
| data unique                                             | 4990                                                                            | 6087                                                                           | 5390                                                                            | 6528                                                                            | 4039                                                                           | 4040                                                                           |
| <i>R</i> <sub>int</sub>                                 | 0.1120                                                                          | 0.0352                                                                         | 0.0258                                                                          | 0.0404                                                                          | 0.1465                                                                         | 0.0269                                                                         |
| no. of observations                                     | 4990                                                                            | 6087                                                                           | 5390                                                                            | 6528                                                                            | 4039                                                                           | 4040                                                                           |
| no. of variables                                        | 301                                                                             | 439                                                                            | 337                                                                             | 392                                                                             | 255                                                                            | 265                                                                            |
| <i>R</i> 1 ( <i>I</i> > 2.00σ( <i>I</i> )) <sup>a</sup> | 0.0950                                                                          | 0.0351                                                                         | 0.0288                                                                          | 0.0432                                                                          | 0.0703                                                                         | 0.0242                                                                         |
| <i>R</i> (all reflections) <sup>a</sup>                 | 0.1627                                                                          | 0.0515                                                                         | 0.0354                                                                          | 0.0496                                                                          | 0.1059                                                                         | 0.0286                                                                         |
| <i>wR</i> 2 (all reflections) <sup>b</sup>              | 0.2871                                                                          | 0.0850                                                                         | 0.0725                                                                          | 0.1030                                                                          | 0.2351                                                                         | 0.0599                                                                         |
| GOF                                                     | 1.046                                                                           | 1.036                                                                          | 1.017                                                                           | 1.210                                                                           | 1.117                                                                          | 1.067                                                                          |
| CCDC No.                                                | 2394123                                                                         | 2394124                                                                        | 2394125                                                                         | 2394126                                                                         | 2394127                                                                        | 2394128                                                                        |

<sup>a</sup>  $R1 = R = \sum ||F_o| - |F_c|| / \sum |F_o|$ . <sup>b</sup>  $wR2 = [\sum w(F_o^2 - F_c^2)^2 / \sum w(F_o^2)^2]^{1/2}$

**Table S1 (continue).** Crystallographic Data.

|                                                                  | <b>4Cl2OH</b>                                                                   | <b>4Me2OH</b>                                                   | <b>5Cl2OH</b>                                                                   | <b>5Br2OH</b>                                                                   | <b>5Me2OH</b>                                                   |
|------------------------------------------------------------------|---------------------------------------------------------------------------------|-----------------------------------------------------------------|---------------------------------------------------------------------------------|---------------------------------------------------------------------------------|-----------------------------------------------------------------|
| formula                                                          | C <sub>36</sub> H <sub>32</sub> Cl <sub>4</sub> O <sub>14</sub> Ru <sub>2</sub> | C <sub>40</sub> H <sub>44</sub> O <sub>14</sub> Ru <sub>2</sub> | C <sub>36</sub> H <sub>32</sub> Cl <sub>4</sub> O <sub>14</sub> Ru <sub>2</sub> | C <sub>36</sub> H <sub>32</sub> Br <sub>4</sub> O <sub>14</sub> Ru <sub>2</sub> | C <sub>40</sub> H <sub>44</sub> O <sub>14</sub> Ru <sub>2</sub> |
| formula weight                                                   | 1032.56                                                                         | 950.89                                                          | 1032.55                                                                         | 1210.39                                                                         | 950.89                                                          |
| crystal system                                                   | monoclinic                                                                      | triclinic                                                       | triclinic                                                                       | triclinic                                                                       | triclinic                                                       |
| space group                                                      | <i>C2/m</i>                                                                     | <i>C2/m</i>                                                     | <i>P-1</i>                                                                      | <i>P-1</i>                                                                      | <i>P-1</i>                                                      |
| <i>a</i> / Å                                                     | 13.1252(6)                                                                      | 12.9788(6)                                                      | 8.8418(5)                                                                       | 9.1173(5)                                                                       | 8.8102(4)                                                       |
| <i>b</i> / Å                                                     | 21.4303(8)                                                                      | 21.3992(9)                                                      | 10.0803(5)                                                                      | 10.0764(4)                                                                      | 10.0823(5)                                                      |
| <i>c</i> / Å                                                     | 9.2625(5)                                                                       | 9.2616(4)                                                       | 11.1109(5)                                                                      | 11.2003(5)                                                                      | 11.2361(5)                                                      |
| $\alpha$ / deg                                                   | 90                                                                              | 90                                                              | 70.742(4)                                                                       | 70.963(4)                                                                       | 70.954(4)                                                       |
| $\beta$ / deg                                                    | 109.540(5)                                                                      | 104.507(4)                                                      | 88.958(4)                                                                       | 89.019(4)                                                                       | 88.666(4)                                                       |
| $\gamma$ / deg                                                   | 90                                                                              | 90                                                              | 81.456(4)                                                                       | 81.985(4)                                                                       | 80.302(4)                                                       |
| <i>V</i> / Å <sup>3</sup>                                        | 2455.3(2)                                                                       | 2490.27(19)                                                     | 924.00(8)                                                                       | 962.75(8)                                                                       | 929.41(8)                                                       |
| <i>Z</i>                                                         | 2                                                                               | 2                                                               | 1                                                                               | 1                                                                               | 1                                                               |
| crystal size / mm <sup>3</sup>                                   | 0.26×0.21×0.09                                                                  | 0.10×0.05×0.05                                                  | 0.03×0.08×0.36                                                                  | 0.03×0.16×0.17                                                                  | 0.05×0.02×0.01                                                  |
| <i>T</i> / K                                                     | 102(1)                                                                          | 102(1)                                                          | 103(1)                                                                          | 103(1)                                                                          | 102(1)                                                          |
| <i>D</i> <sub>calc</sub> / g·cm <sup>-3</sup>                    | 1.533                                                                           | 1.268                                                           | 1.856                                                                           | 2.088                                                                           | 1.699                                                           |
| <i>F</i> <sub>000</sub>                                          | 1144.00                                                                         | 968.00                                                          | 516.00                                                                          | 588.00                                                                          | 484.00                                                          |
| $\lambda$ / Å                                                    | 0.71073                                                                         | 0.71073                                                         | 0.71073                                                                         | 0.71073                                                                         | 0.71073                                                         |
| $\mu$ (Mo K $\alpha$ ) / cm <sup>-1</sup>                        | 8.960                                                                           | 6.760                                                           | 11.780                                                                          | 50.010                                                                          | 8.850                                                           |
| data measured                                                    | 9160                                                                            | 8998                                                            | 10205                                                                           | 10840                                                                           | 12170                                                           |
| data unique                                                      | 2702                                                                            | 2726                                                            | 4164                                                                            | 5567                                                                            | 4455                                                            |
| <i>R</i> <sub>int</sub>                                          | 0.0271                                                                          | 0.0330                                                          | 0.0283                                                                          | 0.0222                                                                          | 0.0836                                                          |
| no. of observations                                              | 2702                                                                            | 2726                                                            | 4164                                                                            | 4318                                                                            | 4455                                                            |
| no. of variables                                                 | 157                                                                             | 161                                                             | 255                                                                             | 255                                                                             | 260                                                             |
| <i>R</i> 1 ( <i>I</i> > 2.00 $\sigma$ ( <i>I</i> )) <sup>a</sup> | 0.0601                                                                          | 0.0502                                                          | 0.0237                                                                          | 0.0268                                                                          | 0.0471                                                          |
| <i>R</i> (all reflections) <sup>a</sup>                          | 0.0781                                                                          | 0.0616                                                          | 0.0265                                                                          | 0.0319                                                                          | 0.0686                                                          |
| <i>wR</i> 2 (all reflections) <sup>b</sup>                       | 0.2144                                                                          | 0.1727                                                          | 0.0610                                                                          | 0.0660                                                                          | 0.1130                                                          |
| GOF                                                              | 1.099                                                                           | 1.075                                                           | 1.057                                                                           | 1.041                                                                           | 1.005                                                           |
| CCDC No.                                                         | 2394129                                                                         | 2394130                                                         | 2394131                                                                         | 2394132                                                                         | 2394133                                                         |

<sup>a</sup>  $R1 = R = \sum ||F_o| - |F_c|| / \sum |F_o|$ . <sup>b</sup>  $wR2 = [\sum w(F_o^2 - F_c^2)^2 / \sum w(F_o^2)^2]^{1/2}$



**Table S1 (continue).** Crystallographic Data.

|                                                                  | <b>ht-4F2OH</b>                                                                 | <b>ht-4Cl2OH</b>                                                                                | <b>ht-4Me2OH</b>                                                                | <b>ht-4OMe2OH</b>                                                               | <b>ht-4CF<sub>3</sub>2OH</b>                                                    | <b>ht-5Me2OH</b>                                                                |
|------------------------------------------------------------------|---------------------------------------------------------------------------------|-------------------------------------------------------------------------------------------------|---------------------------------------------------------------------------------|---------------------------------------------------------------------------------|---------------------------------------------------------------------------------|---------------------------------------------------------------------------------|
| formula                                                          | C <sub>40</sub> H <sub>30</sub> F <sub>14</sub> O <sub>12</sub> Ru <sub>2</sub> | C <sub>40</sub> H <sub>30</sub> Cl <sub>2</sub> F <sub>12</sub> O <sub>12</sub> Ru <sub>2</sub> | C <sub>42</sub> H <sub>36</sub> F <sub>12</sub> O <sub>12</sub> Ru <sub>2</sub> | C <sub>42</sub> H <sub>36</sub> F <sub>12</sub> O <sub>14</sub> Ru <sub>2</sub> | C <sub>42</sub> H <sub>30</sub> F <sub>18</sub> O <sub>12</sub> Ru <sub>2</sub> | C <sub>42</sub> H <sub>36</sub> F <sub>12</sub> O <sub>12</sub> Ru <sub>2</sub> |
| formula weight                                                   | 1170.78                                                                         | 1203.68                                                                                         | 1162.85                                                                         | 1194.85                                                                         | 1270.80                                                                         | 1162.85                                                                         |
| crystal system                                                   | monoclinic                                                                      | monoclinic                                                                                      | monoclinic                                                                      | monoclinic                                                                      | triclinic                                                                       | monoclinic                                                                      |
| space group                                                      | <i>P</i> 2 <sub>1</sub> / <i>n</i>                                              | <i>P</i> 2 <sub>1</sub> / <i>n</i>                                                              | <i>P</i> 2 <sub>1</sub> / <i>n</i>                                              | <i>C</i> 2/ <i>c</i>                                                            | <i>P</i> -1                                                                     | <i>C</i> 2/ <i>c</i>                                                            |
| <i>a</i> / Å                                                     | 11.0125(3)                                                                      | 10.9776(5)                                                                                      | 11.0636(5)                                                                      | 23.8874(17)                                                                     | 9.7520(5)                                                                       | 25.9938(10)                                                                     |
| <i>b</i> / Å                                                     | 14.1717(3)                                                                      | 14.0906(5)                                                                                      | 14.1368(5)                                                                      | 9.9299(4)                                                                       | 10.3379(6)                                                                      | 8.5471(4)                                                                       |
| <i>c</i> / Å                                                     | 14.5066(4)                                                                      | 14.7802(7)                                                                                      | 14.7467(7)                                                                      | 23.6731(19)                                                                     | 11.7134(5)                                                                      | 21.7511(9)                                                                      |
| $\alpha$ / deg                                                   | 90                                                                              | 90                                                                                              | 90                                                                              | 90                                                                              | 91.483(4)                                                                       | 90                                                                              |
| $\beta$ / deg                                                    | 110.034(3)                                                                      | 107.382(5)                                                                                      | 107.557(5)                                                                      | 126.003(11)                                                                     | 105.485(4)                                                                      | 96.794(4)                                                                       |
| $\gamma$ / deg                                                   | 90                                                                              | 90                                                                                              | 90                                                                              | 90                                                                              | 92.535(4)                                                                       | 90                                                                              |
| <i>V</i> / Å <sup>3</sup>                                        | 2126.99(10)                                                                     | 2181.81(17)                                                                                     | 2199.00(17)                                                                     | 4542.7(7)                                                                       | 1136.04(10)                                                                     | 4798.5(4)                                                                       |
| <i>Z</i>                                                         | 2                                                                               | 2                                                                                               | 2                                                                               | 4                                                                               | 1                                                                               | 4                                                                               |
| crystal size / mm <sup>3</sup>                                   | 0.53×0.35×0.27                                                                  | 0.26×0.15×0.12                                                                                  | 0.27×0.24×0.05                                                                  | 0.31×0.11×0.09                                                                  | 0.19×0.09×0.07                                                                  | 0.21×0.13×0.06                                                                  |
| <i>T</i> / K                                                     | 102(1)                                                                          | 102(1)                                                                                          | 102(1)                                                                          | 102(1)                                                                          | 102(1)                                                                          | 102(1)                                                                          |
| <i>D</i> <sub>calc</sub> / g·cm <sup>-3</sup>                    | 1.828                                                                           | 1.832                                                                                           | 1.756                                                                           | 1.747                                                                           | 1.857                                                                           | 1.610                                                                           |
| <i>F</i> <sub>000</sub>                                          | 1160.00                                                                         | 1192.00                                                                                         | 1160.00                                                                         | 2384.00                                                                         | 628.00                                                                          | 2320.00                                                                         |
| $\lambda$ / Å                                                    | 0.71073                                                                         | 0.71073                                                                                         | 0.71073                                                                         | 0.71073                                                                         | 0.71073                                                                         | 0.71073                                                                         |
| $\mu$ (Mo K $\alpha$ ) / cm <sup>-1</sup>                        | 8.340                                                                           | 9.280                                                                                           | 8.000                                                                           | 7.800                                                                           | 8.010                                                                           | 7.330                                                                           |
| data measured                                                    | 18813                                                                           | 15083                                                                                           | 14879                                                                           | 13914                                                                           | 10585                                                                           | 12790                                                                           |
| data unique                                                      | 5120                                                                            | 4637                                                                                            | 5570                                                                            | 5390                                                                            | 4823                                                                            | 4979                                                                            |
| <i>R</i> <sub>int</sub>                                          | 0.0279                                                                          | 0.0351                                                                                          | 0.0229                                                                          | 0.0713                                                                          | 0.0893                                                                          | 0.0774                                                                          |
| no. of observations                                              | 5120                                                                            | 4637                                                                                            | 5570                                                                            | 5390                                                                            | 4823                                                                            | 4979                                                                            |
| no. of variables                                                 | 308                                                                             | 374                                                                                             | 337                                                                             | 318                                                                             | 346                                                                             | 309                                                                             |
| <i>R</i> 1 ( <i>I</i> > 2.00 $\sigma$ ( <i>I</i> )) <sup>a</sup> | 0.0309                                                                          | 0.0296                                                                                          | 0.0338                                                                          | 0.0560                                                                          | 0.0740                                                                          | 0.0497                                                                          |
| <i>R</i> (all reflections) <sup>a</sup>                          | 0.0362                                                                          | 0.0350                                                                                          | 0.0384                                                                          | 0.0735                                                                          | 0.1052                                                                          | 0.0587                                                                          |
| <i>wR</i> 2 (all reflections) <sup>b</sup>                       | 0.0784                                                                          | 0.0732                                                                                          | 0.0823                                                                          | 0.1457                                                                          | 0.1864                                                                          | 0.1480                                                                          |
| GOF                                                              | 1.025                                                                           | 1.117                                                                                           | 1.094                                                                           | 1.056                                                                           | 1.013                                                                           | 1.042                                                                           |
| CCDC No.                                                         | 2394134                                                                         | 2394135                                                                                         | 2394136                                                                         | 2394137                                                                         | 2394138                                                                         | 2394139                                                                         |

<sup>a</sup>  $R1 = R = \sum ||F_o| - |F_c|| / \sum |F_o|$ . <sup>b</sup>  $wR2 = [\sum w(F_o^2 - F_c^2)^2 / \sum w(F_o^2)^2]^{1/2}$

**Table S2.** Magnetic parameters of  $\{\text{Ru}_2^{\text{II,II}}(\text{OH-X-ArCO}_2)_4(\text{THF})_2\}$  compounds obtained from the best-fit of  $\chi$  vs.  $T$  data using a Curie equation for  $S = 1$  with  $g = 2.00$  (fix) and  $zJ = 0$  (fix).

| Compound                     | $D$ [K]   | $\chi_{\text{TIP}} [10^{-6} \text{ cm}^3 \text{ mol}^{-1}]$ | $\rho [10^{-3}]$ |
|------------------------------|-----------|-------------------------------------------------------------|------------------|
| <b>2Cl4OH</b>                | 343.5(9)  | 44(3)                                                       | 112.9(6)         |
| <b>3F4OH</b>                 | 338.1(11) | 47(8)                                                       | 56.7(3)          |
| <b>3Cl4OH</b>                | 387.8(3)  | 25.7(19)                                                    | 9.02(11)         |
| <b>3Br4OH</b>                | 337.2(14) | 170(10)                                                     | 21.6(4)          |
| <b>3F2OH</b>                 | 383.1(9)  | 24(5)                                                       | 3.6(2)           |
| <b>4F2OH</b>                 | 368.7(9)  | 36(6)                                                       | 1.9(2)           |
| <b>4Cl2OH</b>                | 365(5)    | 69(30)                                                      | 168.4(12)        |
| <b>4Me2OH</b>                | 351(3)    | 100(17)                                                     | 92.3(8)          |
| <b>4OMe2OH</b>               | 403(5)    | 93(15)                                                      | 65.7(5)          |
| <b>5Cl2OH</b>                | 368.1(6)  | 54(4)                                                       | 1.37(16)         |
| <b>5Br2OH</b>                | 369.1(13) | 40(11)                                                      | 4.79(13)         |
| <b>5Me2OH</b>                | 392.1(5)  | 72(3)                                                       | 4.27(11)         |
| <b>ht-4F2OH</b>              | 411.4(9)  | 64(6)                                                       | 3.18(16)         |
| <b>ht-4Cl2OH</b>             | 382.2(5)  | 17(3)                                                       | 1.70(12)         |
| <b>ht-4Me2OH</b>             | 401.3(18) | 90(11)                                                      | 34.8(4)          |
| <b>ht-4OMe2OH</b>            | 386.0(12) | 81(8)                                                       | 16.3(3)          |
| <b>ht-4CF<sub>3</sub>2OH</b> | 462(4)    | 66(21)                                                      | 57.8(6)          |
| <b>ht-5Me2OH</b>             | 452(3)    | 47(18)                                                      | 11.4(5)          |

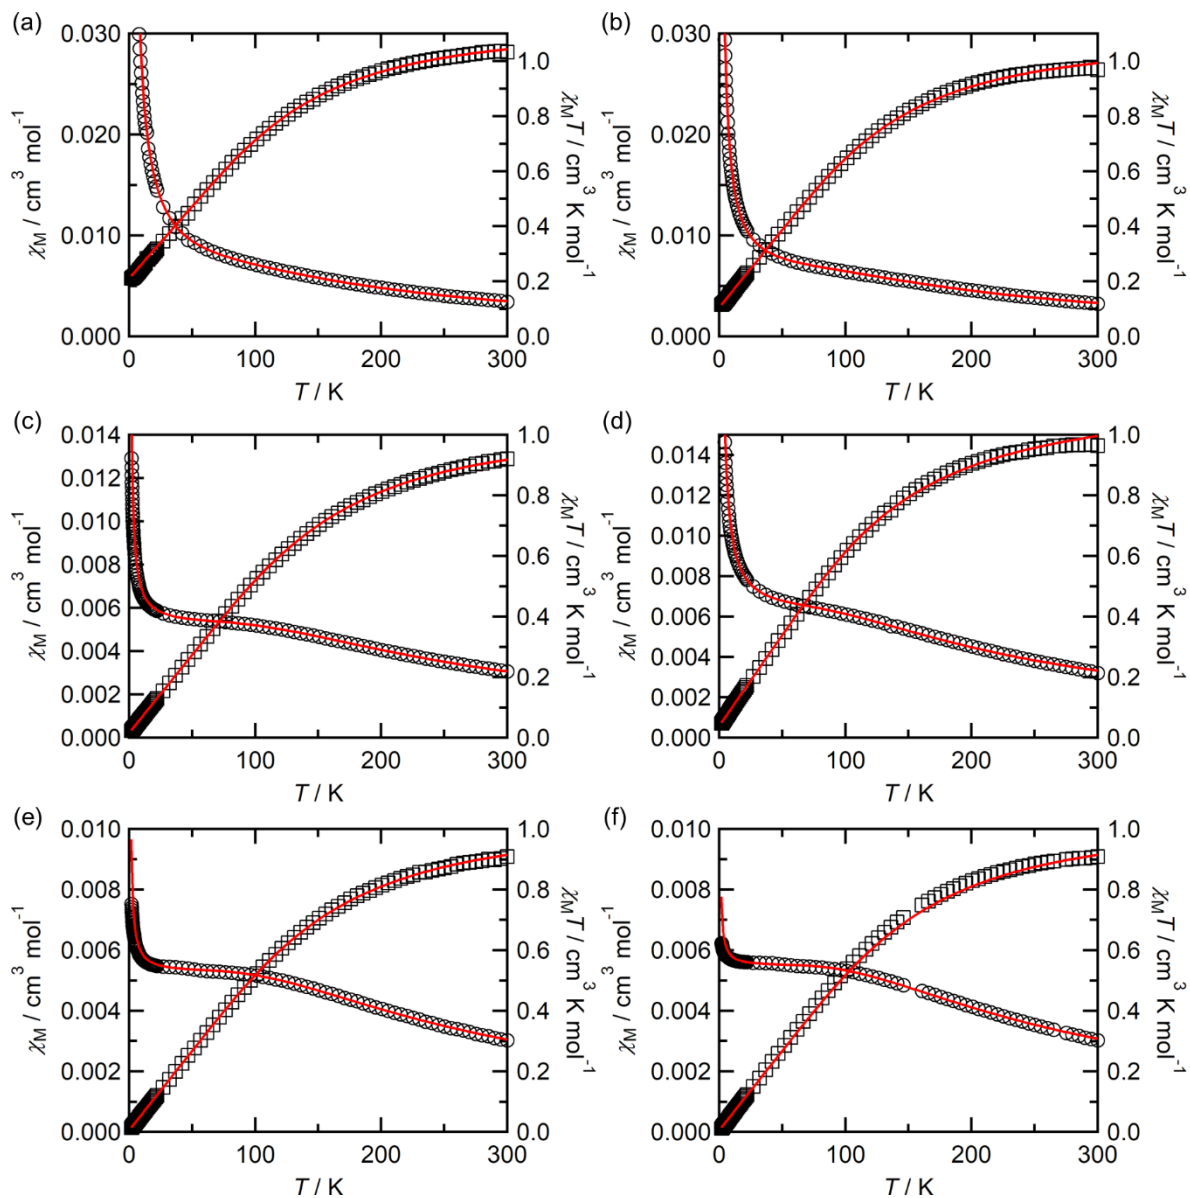

**Fig. S1.** Temperature dependence of  $\chi$  ( $\circ$ ) and  $\chi T$  ( $\square$ ) for **2Cl4OH**, (a), **3F4OH** (b), **3Cl4OH** (c), **3Br4OH** (d), **3F2OH** (e), and **4F2OH** (f), where the red solid lines represent simulated curves based on a Curie paramagnetic model with  $S = 1$  taking into account zero-field splitting ( $D$ ), temperature-independent paramagnetism ( $\chi_{\text{TIP}}$ ), and impurity with  $S = 3/2$  ( $\rho$ ).

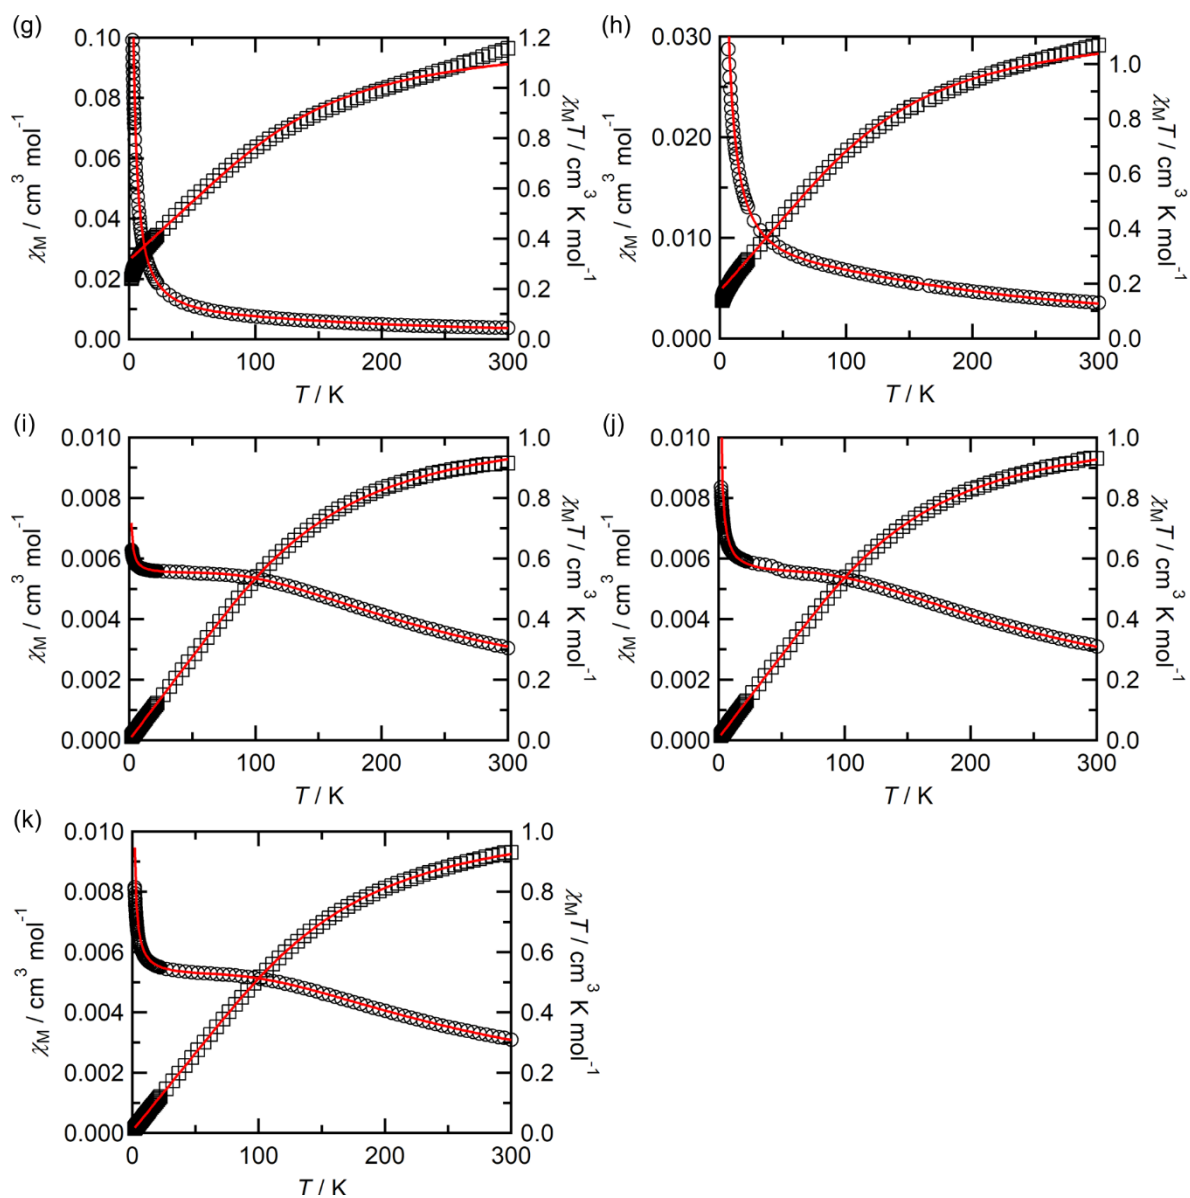

**Fig. S1 (continue).** Temperature dependence of  $\chi$  ( $\circ$ ) and  $\chi T$  ( $\square$ ) for **4Cl<sub>2</sub>OH**, (g), **4Me<sub>2</sub>OH** (h), **5Cl<sub>2</sub>OH** (i), **5Br<sub>2</sub>OH** (j), and **5Me<sub>2</sub>OH** (k), where the red solid lines represent simulated curves based on a Curie paramagnetic model with  $S = 1$  taking into account zero-field splitting ( $D$ ), temperature-independent paramagnetism ( $\chi_{\text{TIP}}$ ), and impurity with  $S = 3/2$  ( $\rho$ ).

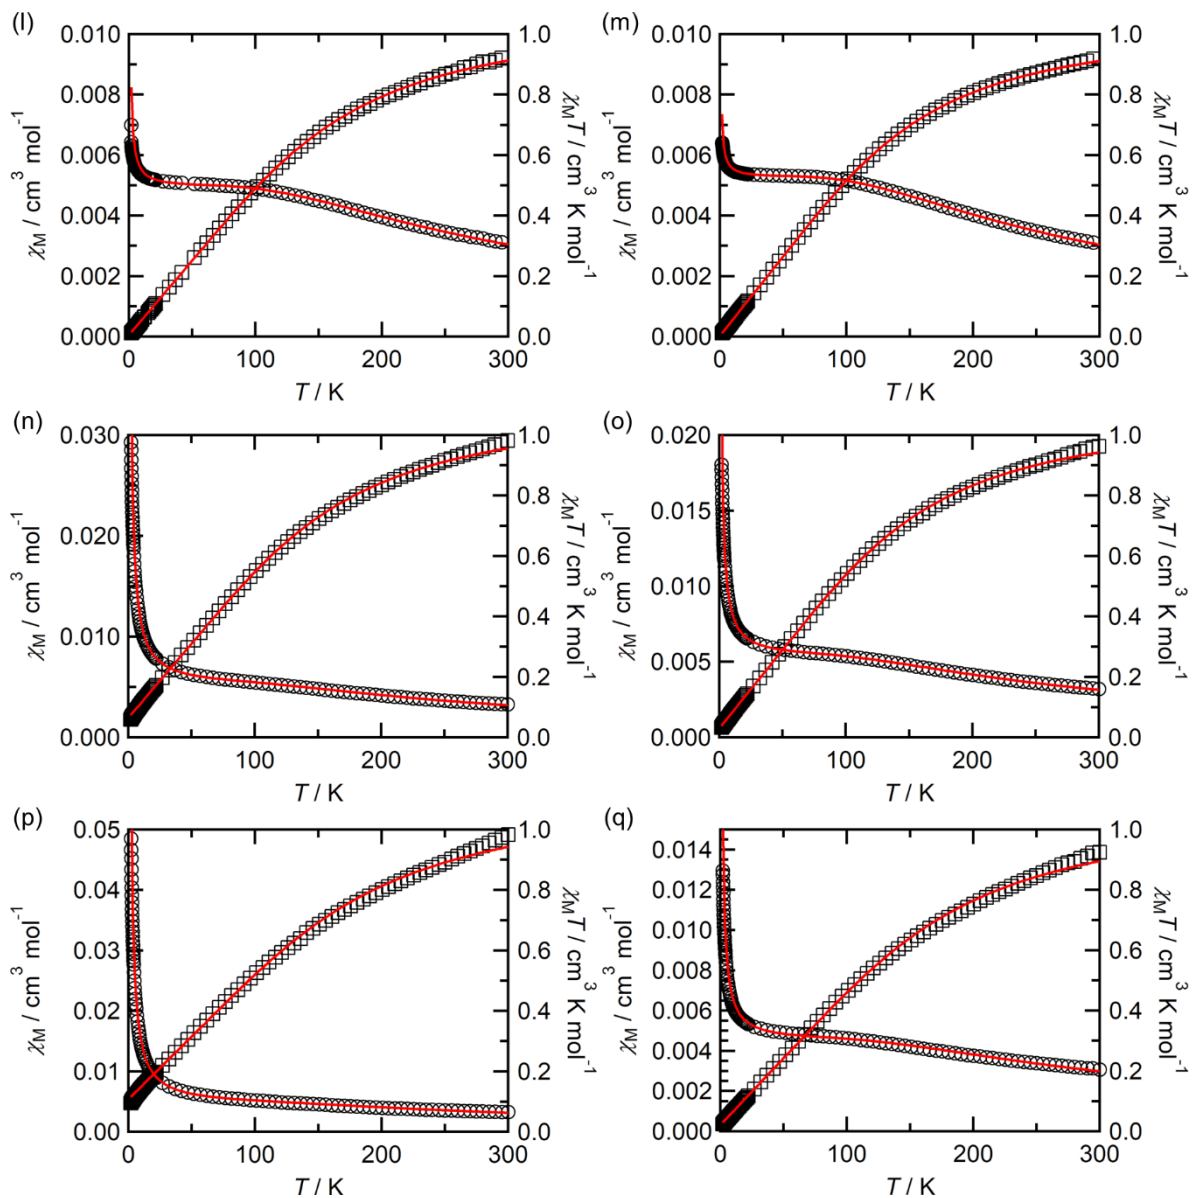

**Fig. S1 (continue).** Temperature dependence of  $\chi$  ( $\circ$ ) and  $\chi T$  ( $\square$ ) for **ht-4F2OH**, (l), **ht-4Cl2OH** (m), **ht-4Me2OH** (n), **ht-4OMe2OH** (o), **ht-4CF<sub>3</sub>2OH** (p), and **ht-5Me2OH** (q), where the red solid lines represent simulated curves based on a Curie paramagnetic model with  $S = 1$  taking into account zero-field splitting ( $D$ ), temperature-independent paramagnetism ( $\chi_{\text{TIP}}$ ), and impurity with  $S = 3/2$  ( $\rho$ ).

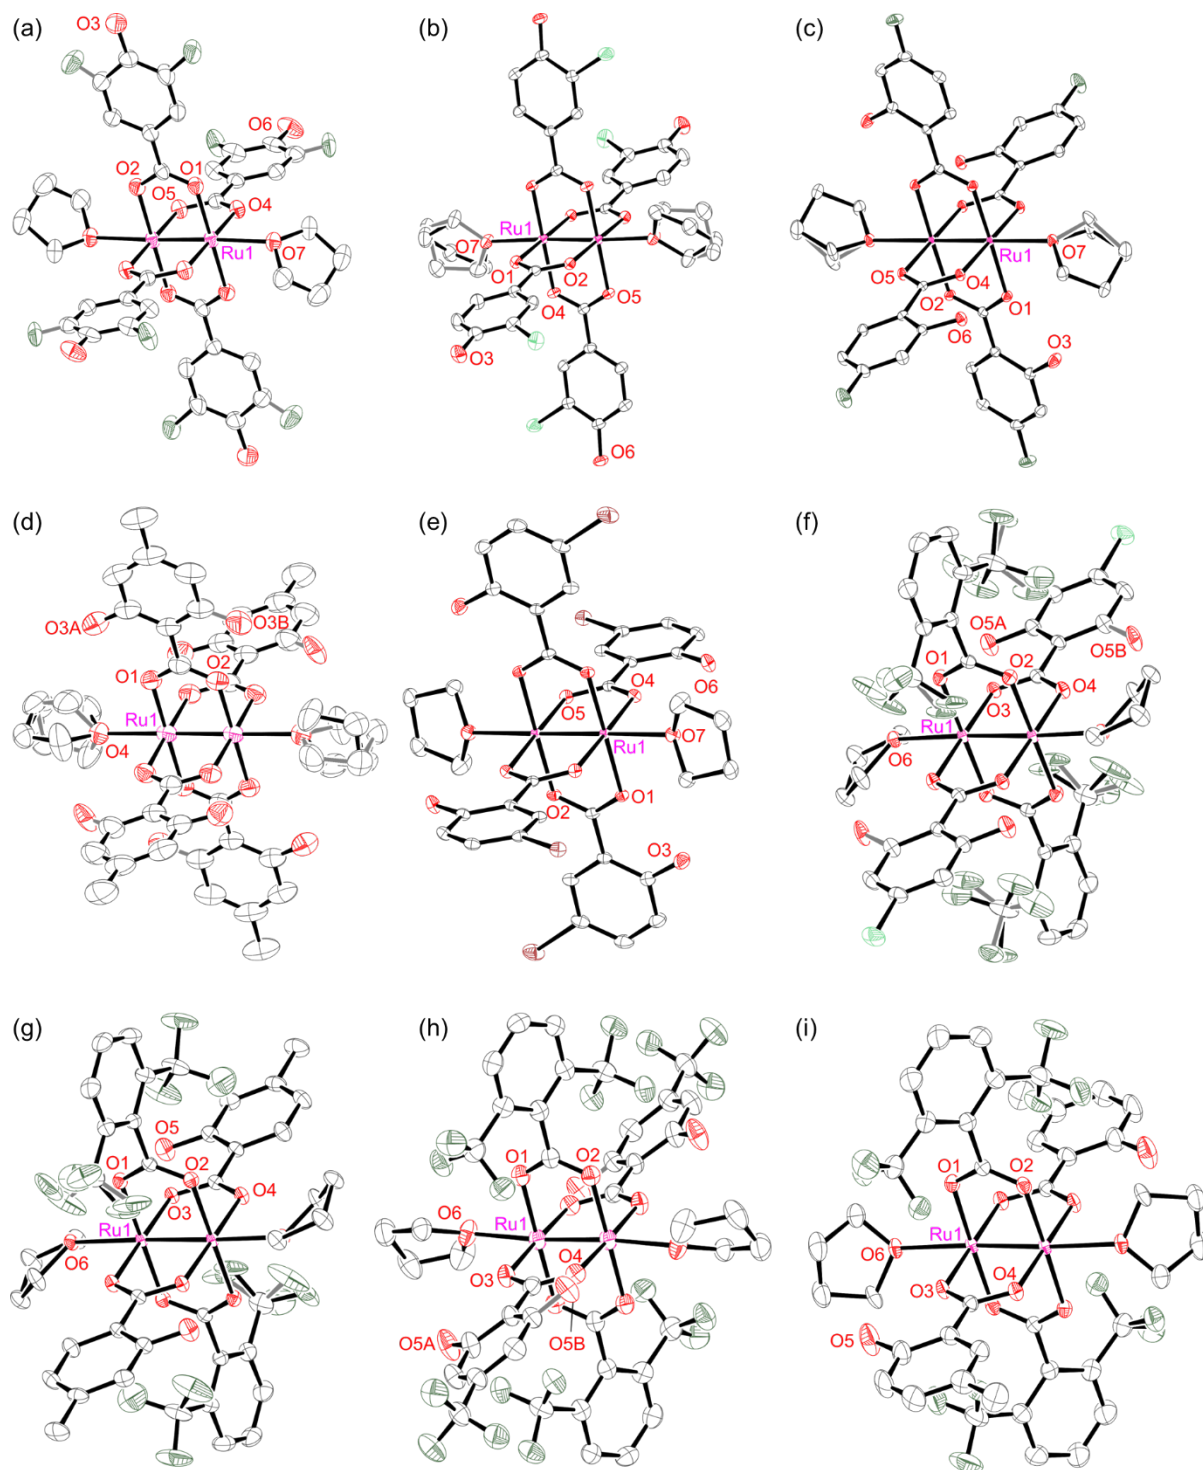

**Fig. S2.** ORTEP drawings of for **3F4OH**, (a), **3Cl4OH** (b), **4F2OH** (c), **4Me2OH** (d), **5Br2OH** (e), **ht-4Cl2OH** (f), **ht-4Me2OH** (g), **ht-4CF<sub>3</sub>2OH** (h), and **ht-5Me2OH** (i), Red, gray, green, light green, purple, and pink represent O, C, F, Cl, Br, and Ru, respectively. The grey bonds represent disordered atomic positions. Displacement ellipsoids are drawn at a 50% probability level. Hydrogen atoms and crystallization solvents are omitted for clarity.

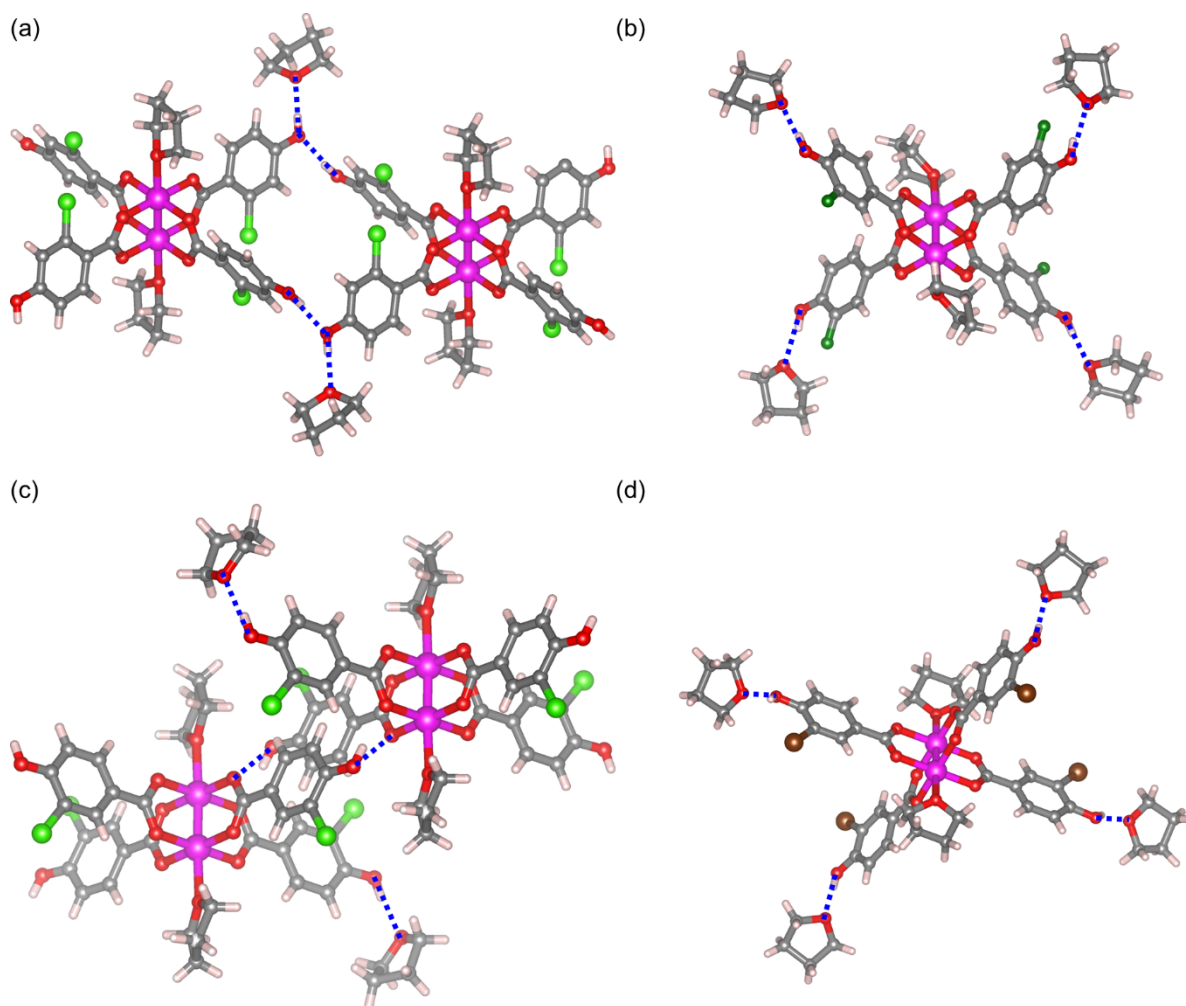

**Fig. S3.** Molecular structures focused on intermolecular hydrogen bond; **2Cl<sub>4</sub>OH**, (a), **3F<sub>4</sub>OH** (b), **3Cl<sub>4</sub>OH** (c), and **3Br<sub>4</sub>OH** (d). Red, gray, green, light green, purple, light brown, and pink represent O, C, F, Cl, Br, H, and Ru, respectively. Intermolecular hydrogen bond is depicted in blue dotted line.

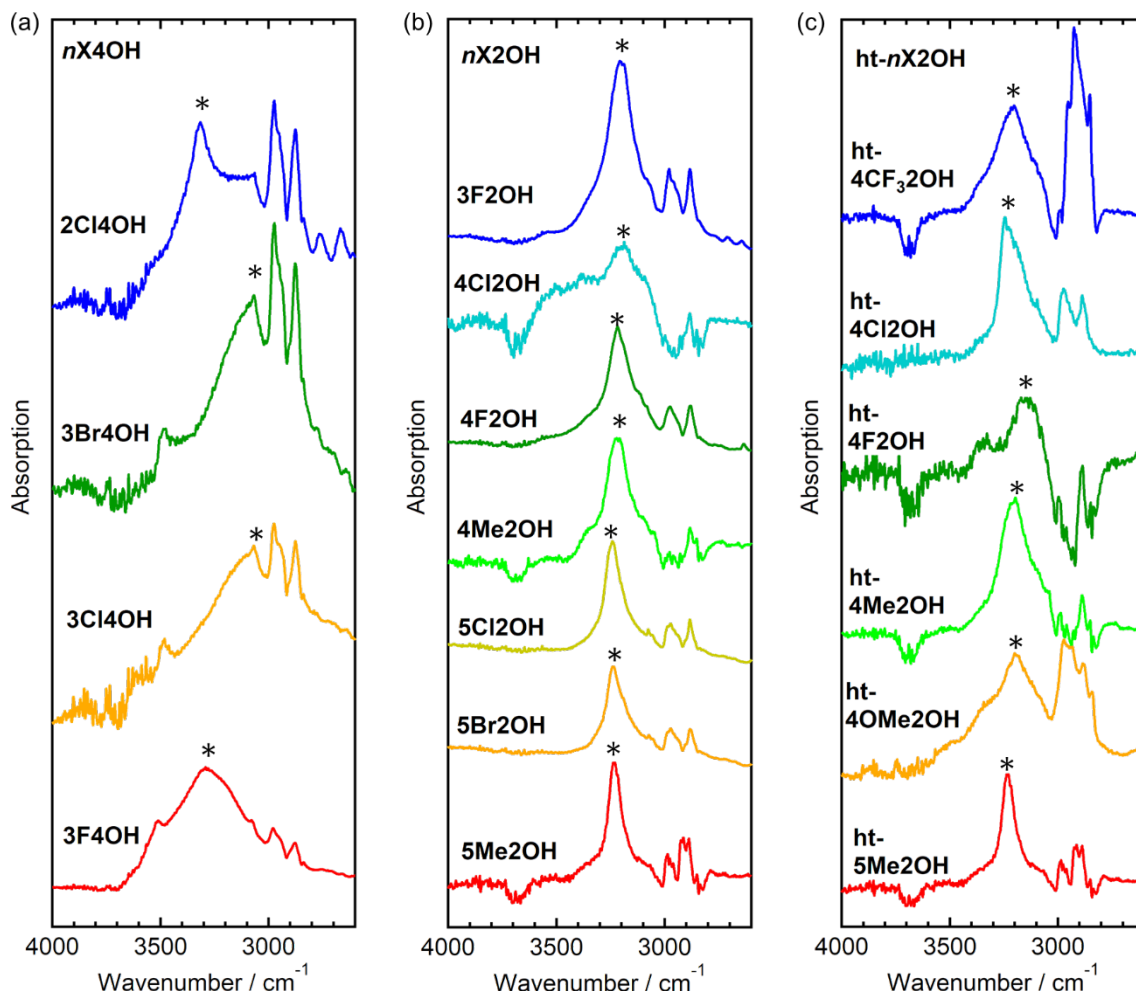

**Fig. S4.** IR spectra in the OH stretching region, where the peak positions are indicated by asterisks (\*),  $nX4OH$  (a),  $nX2OH$  (b), and  $ht-nX2OH$  (c).



### Determination of Hammett constants for *ortho*-substituents

The Hammett constants are only known for the *m*- and *p*- substituents, though we experimentally determined the Hammett constant for the *o*-F, *o*-Cl, and *o*-OH group that can be used for the prediction of  $E_{1/2}$  value of [Ru<sub>2</sub>] from the Hammett analyses. To determine  $\sigma_o$ , the error for the least-squares linear fit in the plot of  $E_{1/2}$  vs.  $\Sigma(\alpha\sigma_m + \beta\sigma_p + \gamma\sigma_o)$  was minimized for the respective series, providing  $\sigma_o$  values of 0.217, 0.272, and 0.667 for F, Cl, and OH series, respectively.<sup>1,2</sup>

Similarly, Hammett constants for the *o*-Me, *o*-OMe, and *o*-CF<sub>3</sub> groups were determined as -0.070, -0.397, and 0.50, respectively. The  $E_{1/2}$  values of previously reported [Ru<sub>2</sub>] compounds were used, listed in Table S3 and S4.<sup>3,4</sup>

**Table S3.** Electrochemical data<sup>a</sup> and the HOMO level calculated by density functional theory of reported [Ru<sub>2</sub>(R<sub>n</sub>ArCO<sub>2</sub>)<sub>4</sub>(THF)<sub>2</sub>].

|    | R                         | $E_{1/2}$ / mV | HOMO energy / eV | p <i>K</i> <sub>a</sub> of benzoic acid <sup>b</sup> | $\Sigma(\alpha\sigma_m + \beta\sigma_p)^c$ | $\Sigma(\alpha\sigma_m + \beta\sigma_p + \gamma\sigma_o)^{c,d}$ | Ref |
|----|---------------------------|----------------|------------------|------------------------------------------------------|--------------------------------------------|-----------------------------------------------------------------|-----|
| 1  | 3,4,5-F <sub>3</sub>      | 274            | -5.0678          | 3.46                                                 | 0.736                                      | 0.736                                                           | 1,5 |
| 2  | 3,5-F <sub>2</sub>        | 178            | -4.9566          | 3.52                                                 | 0.674                                      | 0.674                                                           | 1,5 |
| 3  | 3,4-F <sub>2</sub>        | 144            | -4.7677          | 3.80                                                 | 0.399                                      | 0.399                                                           | 1,5 |
| 4  | <i>m</i> -F               | 42             | -4.4218          | 3.86                                                 | 0.337                                      | 0.337                                                           | 1,5 |
| 5  | <i>p</i> -F               | -39            | -4.5114          | 4.14                                                 | 0.062                                      | 0.062                                                           | 1,5 |
| 6  | 3,4,5-Cl <sub>3</sub>     | 266            | -5.0692          | 3.23                                                 | 0.973                                      | 0.973                                                           | 1   |
| 7  | 3,5-Cl <sub>2</sub>       | 221            | -4.9391          | 3.46                                                 | 0.746                                      | 0.746                                                           | 1   |
| 8  | 3,4-Cl <sub>2</sub>       | 112            | -4.7759          | 3.60                                                 | 0.600                                      | 0.600                                                           | 1   |
| 9  | <i>m</i> -Cl              | 86             | -4.5323          | 3.83                                                 | 0.373                                      | 0.373                                                           | 1   |
| 10 | <i>p</i> -Cl              | 22             | -4.5048          | 3.98                                                 | 0.227                                      | 0.227                                                           | 1   |
| 11 | <i>m</i> -Me              | -99            | -4.1372          | 4.27                                                 | -0.069                                     | -0.069                                                          | 3   |
| 12 | <i>p</i> -Me              | -116           | -4.0401          | 4.37                                                 | -0.170                                     | -0.170                                                          | 3   |
| 13 | <i>p</i> -CF <sub>3</sub> | 116            | -4.7454          | 3.69                                                 | 0.540                                      | 0.540                                                           | 6   |
| 14 | H                         | 60             | -4.1326          | 4.20                                                 | 0                                          | 0                                                               | 6   |
| 15 | <i>p</i> -Ph              | 38             | -4.2673          | 4.19                                                 | 0.144                                      | 0.144                                                           | 6   |
| 16 | <i>p</i> -OMe             | -184           | -3.9318          | 4.47                                                 | -0.268                                     | -0.268                                                          | 6   |
| 17 | <i>p</i> -CHO             | 67             | -4.8412          | 3.78                                                 | 0.420                                      | 0.420                                                           | 7   |
| 18 | F <sub>5</sub>            | 358            | -5.1144          | 1.60                                                 | 0.736                                      | 1.170                                                           | 1,5 |
| 19 | 2,3,5,6-F <sub>4</sub>    | 360            | -4.8518          | 1.66                                                 | 0.674                                      | 1.108                                                           | 1,5 |
| 20 | 2,3,4,5-F <sub>4</sub>    | 315            | -5.0578          | 2.53                                                 | 0.736                                      | 0.953                                                           | 1,5 |
| 21 | 2,3,6-F <sub>3</sub>      | 336            | -4.6502          | 2.00                                                 | 0.337                                      | 0.771                                                           | 1,5 |
| 22 | 2,4,5-F <sub>3</sub>      | 214            | -4.8893          | 2.87                                                 | 0.399                                      | 0.616                                                           | 1,5 |
| 23 | 2,3,4-F <sub>3</sub>      | 209            | -4.9432          | 2.87                                                 | 0.399                                      | 0.616                                                           | 1,5 |
| 24 | 2,3,5-F <sub>3</sub>      | 225            | -4.8785          | 2.59                                                 | 0.674                                      | 0.891                                                           | 1   |
| 25 | 2,4,6-F <sub>3</sub>      | 172            | -4.7424          | 2.28                                                 | 0.062                                      | 0.496                                                           | 1,5 |
| 26 | 2,5-F <sub>2</sub>        | 99             | -4.6401          | 2.93                                                 | 0.337                                      | 0.554                                                           | 1   |
| 27 | 2,3-F <sub>2</sub>        | 93             | -4.5223          | 2.93                                                 | 0.337                                      | 0.554                                                           | 1   |
| 28 | 2,6-F <sub>2</sub>        | 51             | -4.3242          | 2.34                                                 | 0                                          | 0.434                                                           | 1,5 |
| 29 | 2,4-F <sub>2</sub>        | 35             | -4.4874          | 3.21                                                 | 0.062                                      | 0.399                                                           | 1   |
| 30 | <i>o</i> -F               | 35             | -4.1840          | 3.27                                                 | 0                                          | 0.217                                                           | 1,5 |
| 31 | 2,3,4,5-Cl <sub>4</sub>   | 337            | -5.0235          | 1.80                                                 | 0.973                                      | 1.245                                                           | 1   |
| 32 | 2,3,5-Cl <sub>3</sub>     | 296            | -4.9212          | 2.09                                                 | 0.746                                      | 1.018                                                           | 1   |
| 33 | 2,3,4-Cl <sub>3</sub>     | 240            | -5.1590          | 2.23                                                 | 0.600                                      | 0.872                                                           | 1   |
| 34 | 2,4,5-Cl <sub>3</sub>     | 226            | -4.9255          | 2.25                                                 | 0.600                                      | 0.872                                                           | 1   |
| 35 | 2,5-Cl <sub>2</sub>       | 167            | -4.5906          | 2.51                                                 | 0.373                                      | 0.645                                                           | 1   |
| 36 | 2,3-Cl <sub>2</sub>       | 154            | -4.5516          | 2.53                                                 | 0.373                                      | 0.645                                                           | 1   |
| 37 | 2,6-Cl <sub>2</sub>       | 130            | -4.4512          | 1.69                                                 | 0                                          | 0.544                                                           | 1   |
| 38 | 2,4-Cl <sub>2</sub>       | 112            | -4.7759          | 3.60                                                 | 0.600                                      | 0.600                                                           | 1   |
| 39 | <i>o</i> -Cl              | 41             | -4.1677          | 2.94                                                 | 0                                          | 0.272                                                           | 1   |
| 40 | <i>o</i> -Me              | -94            | -4.1617          | 3.95                                                 | 0                                          | -0.070                                                          | 3   |
| 41 | 2,4,5-Me <sub>3</sub>     | -179           | -3.9038          | 4.24                                                 | -0.239                                     | -0.309                                                          | 8   |
| 42 | <i>o</i> -OMe             | -228           | -3.7270          | 4.09                                                 | 0                                          | -0.397                                                          | 4   |
| 43 | 4-Cl-2-OMe                | -131           | -4.1323          | 3.86                                                 | 0.227                                      | -0.170                                                          | 4   |
| 44 | 4-F-2-OMe                 | -178           | -4.0866          | 4.03                                                 | 0.062                                      | -0.335                                                          | 4   |
| 45 | <i>o</i> -CF <sub>3</sub> | 126            | -4.3821          | 3.20                                                 | 0                                          | 0.500                                                           | 3   |

<sup>a</sup>Measured in THF containing 0.1 M *n*-Bu<sub>4</sub>N(PF<sub>6</sub>) under N<sub>2</sub> (mV vs. Ag/Ag<sup>+</sup>). The ferrocene/ferrocenium couple, Fc/Fc<sup>+</sup> = 213 mV, was observe at the same condition. <sup>b</sup>Predicted values calculated using Advanced Chemistry Development (ACD/Labs) Software V11.02, which were obtained from SciFinder-*n* database.

<sup>c</sup>Hammett constants  $\sigma_m$  and  $\sigma_p$  were taken from ref. 9. <sup>d</sup>Hammett constants  $\sigma_o$  were taken from ref. 1.

**Table S4.** Electrochemical data<sup>a</sup> and the HOMO level calculated by density functional theory of reported [Ru<sub>2</sub>{2,6-(CF<sub>3</sub>)<sub>2</sub>ArCO<sub>2</sub>}<sub>2</sub>(R<sub>n</sub>ArCO<sub>2</sub>)<sub>2</sub> (THF)<sub>2</sub>].

|    | R                         | $E_{1/2}$ / mV | HOMO energy / eV | p <i>K</i> <sub>a</sub> of benzoic acid <sup>b</sup> | $\Sigma(\alpha\sigma_m + \beta\sigma_p)^c$ | $\Sigma(\alpha\sigma_m + \beta\sigma_p + \gamma\sigma_o)^{c,d}$ | Ref |
|----|---------------------------|----------------|------------------|------------------------------------------------------|--------------------------------------------|-----------------------------------------------------------------|-----|
| 46 | <i>o</i> -OH              | 291            | -4.5900          | 3.01                                                 | 0                                          | 0.689                                                           | 2   |
| 47 | <i>m</i> -OH              | 76             | -4.3680          | 4.08                                                 | 0.121                                      | 0.121                                                           | 2   |
| 48 | <i>p</i> -OH              | -18            | -4.3214          | 4.57                                                 | -0.370                                     | -0.370                                                          | 2   |
| 49 | 2,3-(OH) <sub>2</sub>     | 240            | -4.6716          | 2.96                                                 | 0.121                                      | 0.810                                                           | 2   |
| 50 | 2,4-(OH) <sub>2</sub>     | 192            | -4.5642          | 3.32                                                 | -0.370                                     | 0.319                                                           | 2   |
| 51 | 2,5-(OH) <sub>2</sub>     | 280            | -4.6746          | 3.01                                                 | 0.121                                      | 0.810                                                           | 2   |
| 52 | 2,6-(OH) <sub>2</sub>     | 432            | -4.8540          | 1.30                                                 | 0                                          | 1.378                                                           | 2   |
| 53 | 3,4-(OH) <sub>2</sub>     | 18             | -4.3503          | 4.45                                                 | -0.248                                     | -0.248                                                          | 2   |
| 54 | <i>p</i> -CF <sub>3</sub> | 237            | -4.6602          | 3.69                                                 | 0.540                                      | 0.540                                                           | 6   |
| 55 | <i>p</i> -Cl              | 176            | -4.6208          | 3.98                                                 | 0.227                                      | 0.227                                                           | 6   |
| 56 | <i>p</i> -F               | 160            | -4.5658          | 4.14                                                 | 0.062                                      | 0.062                                                           | 6   |
| 57 | H                         | 108            | -4.400           | 4.20                                                 | 0                                          | 0                                                               | 6   |
| 58 | <i>p</i> -Ph              | 112            | -4.4025          | 4.19                                                 | 0.009                                      | 0.009                                                           | 6   |
| 59 | <i>p</i> -Me              | 83             | -4.3046          | 4.37                                                 | -0.170                                     | -0.170                                                          | 6   |
| 60 | <i>p</i> -OMe             | 42             | -4.2335          | 4.47                                                 | -0.268                                     | -0.268                                                          | 6   |
| 61 | <i>p</i> -CHO             | 185            | -4.6820          | 3.78                                                 | 0.420                                      | 0.420                                                           | 7   |
| 62 | 2,3,5,6-F <sub>4</sub>    | 314            | -4.7960          | 1.66                                                 | 0.674                                      | 1.108                                                           | 10  |

<sup>a</sup>Measured in THF containing 0.1 M *n*-Bu<sub>4</sub>N(PF<sub>6</sub>) under N<sub>2</sub> (mV vs. Ag/Ag<sup>+</sup>). The ferrocene/ferrocenium couple, Fc/Fc<sup>+</sup> = 213 mV, was observed at the same condition. <sup>b</sup>Predicted values calculated using Advanced Chemistry Development (ACD/Labs) Software V11.02, which were obtained from SciFinder-*n* database. <sup>c</sup>Hammett constants  $\sigma_m$  and  $\sigma_p$  were taken from ref. 9. <sup>d</sup>Hammett constants  $\sigma_o$  were taken from ref. 1.

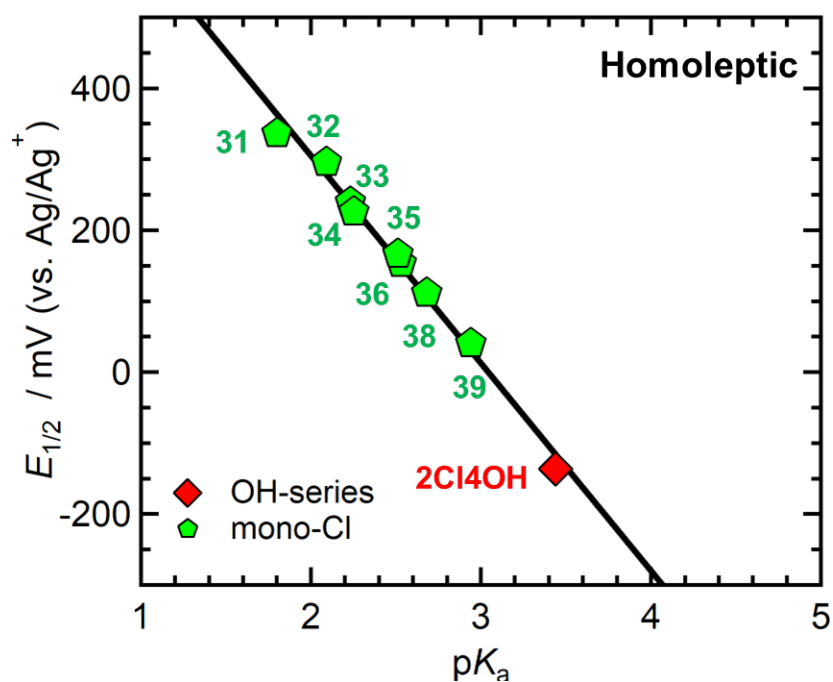

**Fig. S5.** Plot of half-wave redox potential ( $E_{1/2}$ ) vs. pK<sub>a</sub> for the corresponding benzoic acids in the homoleptic mono-Cl series of  $[\text{Ru}_2(\text{R}_n\text{ArCO}_2)_4(\text{THF})_2]$ .  $E_{1/2}$  values are measured in THF with a Ag/Ag<sup>+</sup> reference electrode. Light green symbols represent the homoleptic compounds taken from ref. 1. The solid line represents the linear least-squares fitted line with an equation of  $y = -292.61x + 890.2$  ( $R^2 = 0.9895$ ). Definitions:  $[\text{Ru}_2(\text{R}_n\text{ArCO}_2)_4(\text{THF})_2]$ , R for **31**, 2,3,4,5-Cl<sub>4</sub>; **32**, 2,3,5-Cl<sub>3</sub>; **33**, 2,3,4-Cl<sub>3</sub>; **34**, 2,4,5-Cl<sub>3</sub>; **35**, 2,5-Cl<sub>2</sub>; **36**, 2,3-Cl<sub>2</sub>; **38**, 2,4-Cl<sub>2</sub>; **39**, *o*-Cl.

**Table S5.** Estimated energy levels (eV) of  $\pi^*$ - and  $\delta^*$ -characteristic orbitals for  $[\text{Ru}_2^{\text{II,II}}]$  complexes.

| <b>Electron character</b> | <b>Orbital character</b> | <b>2Cl4OH</b> | <b>3F4OH</b> | <b>3Cl4OH</b> | <b>3Br4OH</b> |
|---------------------------|--------------------------|---------------|--------------|---------------|---------------|
| $\beta$                   | $\pi^*$                  | -1.66017      | -1.82262     | -1.74942      | -1.85201      |
|                           | $\pi^*$                  | -1.75405      | -1.92031     | -1.86861      | -1.96494      |
|                           | $\delta^*$               | -4.15219      | -4.34675     | -4.30675      | -4.38702      |
| $\alpha$                  | $\delta^*$               | -4.57696      | -4.77206     | -4.73179      | -4.81261      |
|                           | $\pi^*$                  | -4.81016      | -4.98839     | -4.90785      | -5.02105      |
|                           | $\pi^*$                  | -4.93071      | -5.10921     | -5.04908      | -5.14241      |

  

| <b>Electron character</b> | <b>Orbital character</b> | <b>3F2OH</b> | <b>4F2OH</b> | <b>4Cl2OH</b> | <b>4Me2OH</b> |
|---------------------------|--------------------------|--------------|--------------|---------------|---------------|
| $\beta$                   | $\pi^*$                  | -2.35814     | -2.41583     | -2.45148      | -1.89609      |
|                           | $\pi^*$                  | -2.52767     | -2.53447     | -2.56658      | -2.02017      |
|                           | $\delta^*$               | -4.97615     | -4.99220     | -5.00771      | -4.43981      |
| $\alpha$                  | $\delta^*$               | -5.39956     | -5.41561     | -5.4314       | -4.86213      |
|                           | $\pi^*$                  | -5.49425     | -5.57289     | -5.60392      | -5.04826      |
|                           | $\pi^*$                  | -5.70814     | -5.72092     | -5.74732      | -5.19629      |

  

| <b>Electron character</b> | <b>Orbital character</b> | <b>5Cl2OH</b> | <b>5Br2OH</b> | <b>5Me2OH</b> |
|---------------------------|--------------------------|---------------|---------------|---------------|
| $\beta$                   | $\pi^*$                  | -2.49610      | -2.52903      | -2.03405      |
|                           | $\pi^*$                  | -2.60440      | -2.63869      | -2.15596      |
|                           | $\delta^*$               | -5.07629      | -5.10894      | -4.59982      |
| $\alpha$                  | $\delta^*$               | -5.50106      | -5.53344      | -5.02268      |
|                           | $\pi^*$                  | -5.65018      | -5.68419      | -5.18105      |
|                           | $\pi^*$                  | -5.79276      | -5.82650      | -5.33343      |

  

| <b>Electron character</b> | <b>Orbital character</b> | <b>ht-4F2OH</b> | <b>ht-4Cl2OH</b> | <b>ht-4Me2OH</b> | <b>ht-4OMe2OH</b> |
|---------------------------|--------------------------|-----------------|------------------|------------------|-------------------|
| $\beta$                   | $\pi^*$                  | -2.19841        | -2.14344         | -1.97854         | -1.93446          |
|                           | $\pi^*$                  | -2.27324        | -2.23079         | -2.04630         | -2.00439          |
|                           | $\delta^*$               | -4.75982        | -4.71329         | -4.52852         | -4.47900          |
| $\alpha$                  | $\delta^*$               | -5.18268        | -5.13615         | -4.95084         | -4.89996          |
|                           | $\pi^*$                  | -5.36473        | -5.30677         | -5.14758         | -5.09996          |
|                           | $\pi^*$                  | -5.46160        | -5.42160         | -5.23112         | -5.18023          |

  

| <b>Electron character</b> | <b>Orbital character</b> | <b>ht-4CF<sub>3</sub>2OH</b> | <b>ht-5Me2OH</b> |
|---------------------------|--------------------------|------------------------------|------------------|
| $\beta$                   | $\pi^*$                  | -2.18099                     | -1.94235         |
|                           | $\pi^*$                  | -2.32494                     | -2.10834         |
|                           | $\delta^*$               | -4.76036                     | -4.55002         |
| $\alpha$                  | $\delta^*$               | -5.18459                     | -4.97288         |
|                           | $\pi^*$                  | -5.33806                     | -5.08772         |
|                           | $\pi^*$                  | -5.50459                     | -5.30568         |

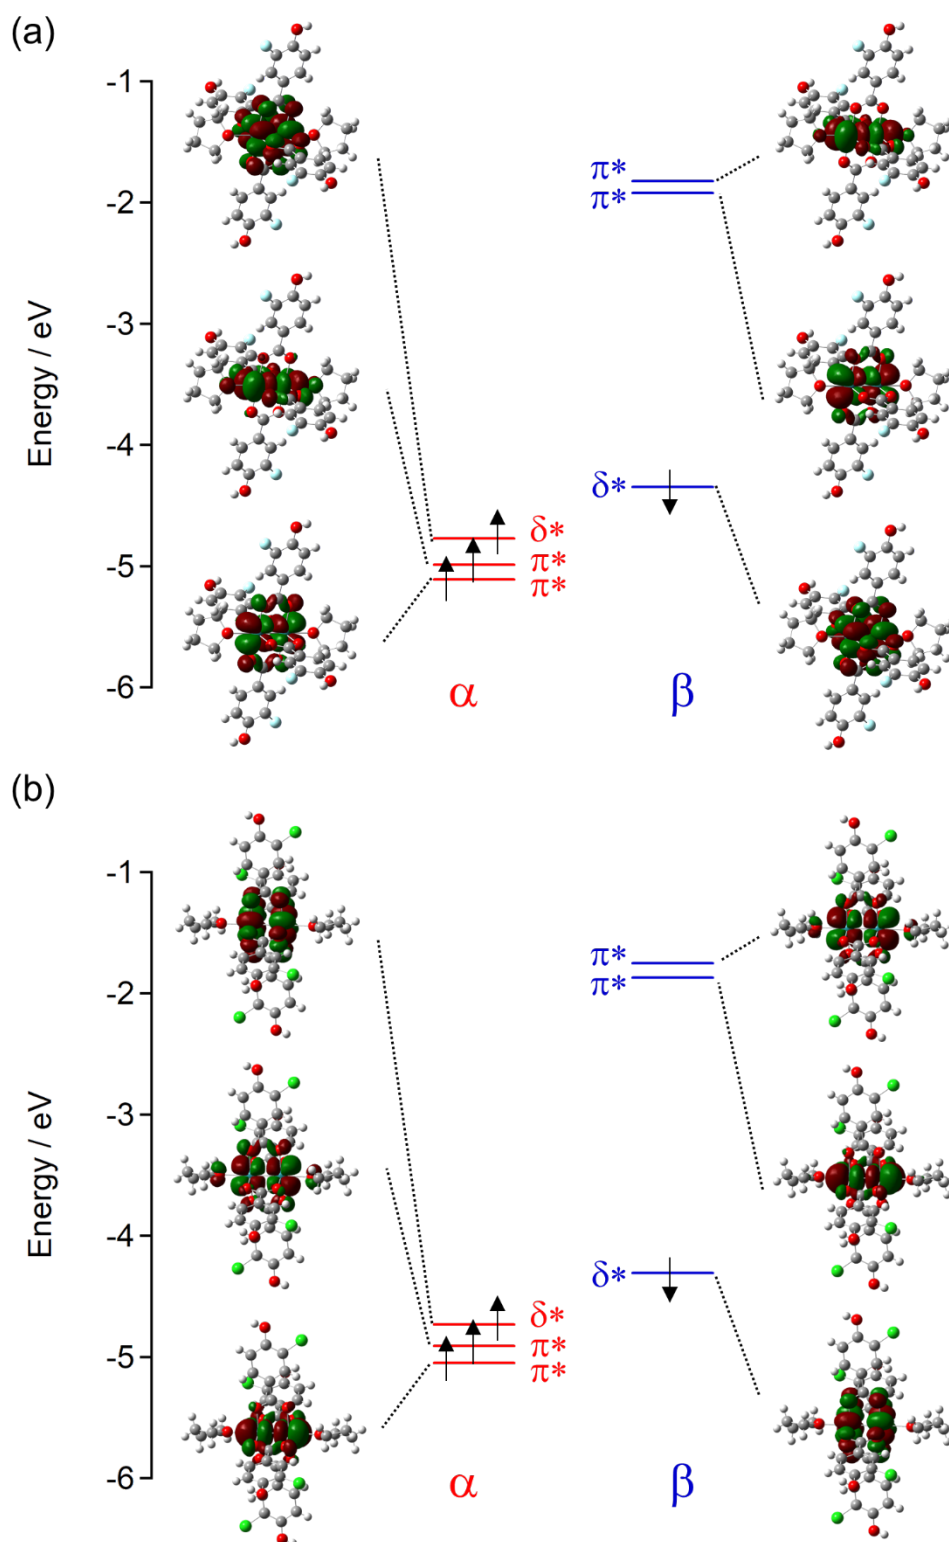

**Fig. S6.** Frontier orbitals associated with  $\pi^*$  and  $\delta^*$  orbitals for **3F4OH** (a) and **3Cl4OH** (b), and their energy levels (eV), where  $\delta^*$  for  $\beta$  electron corresponds to HOMO level.

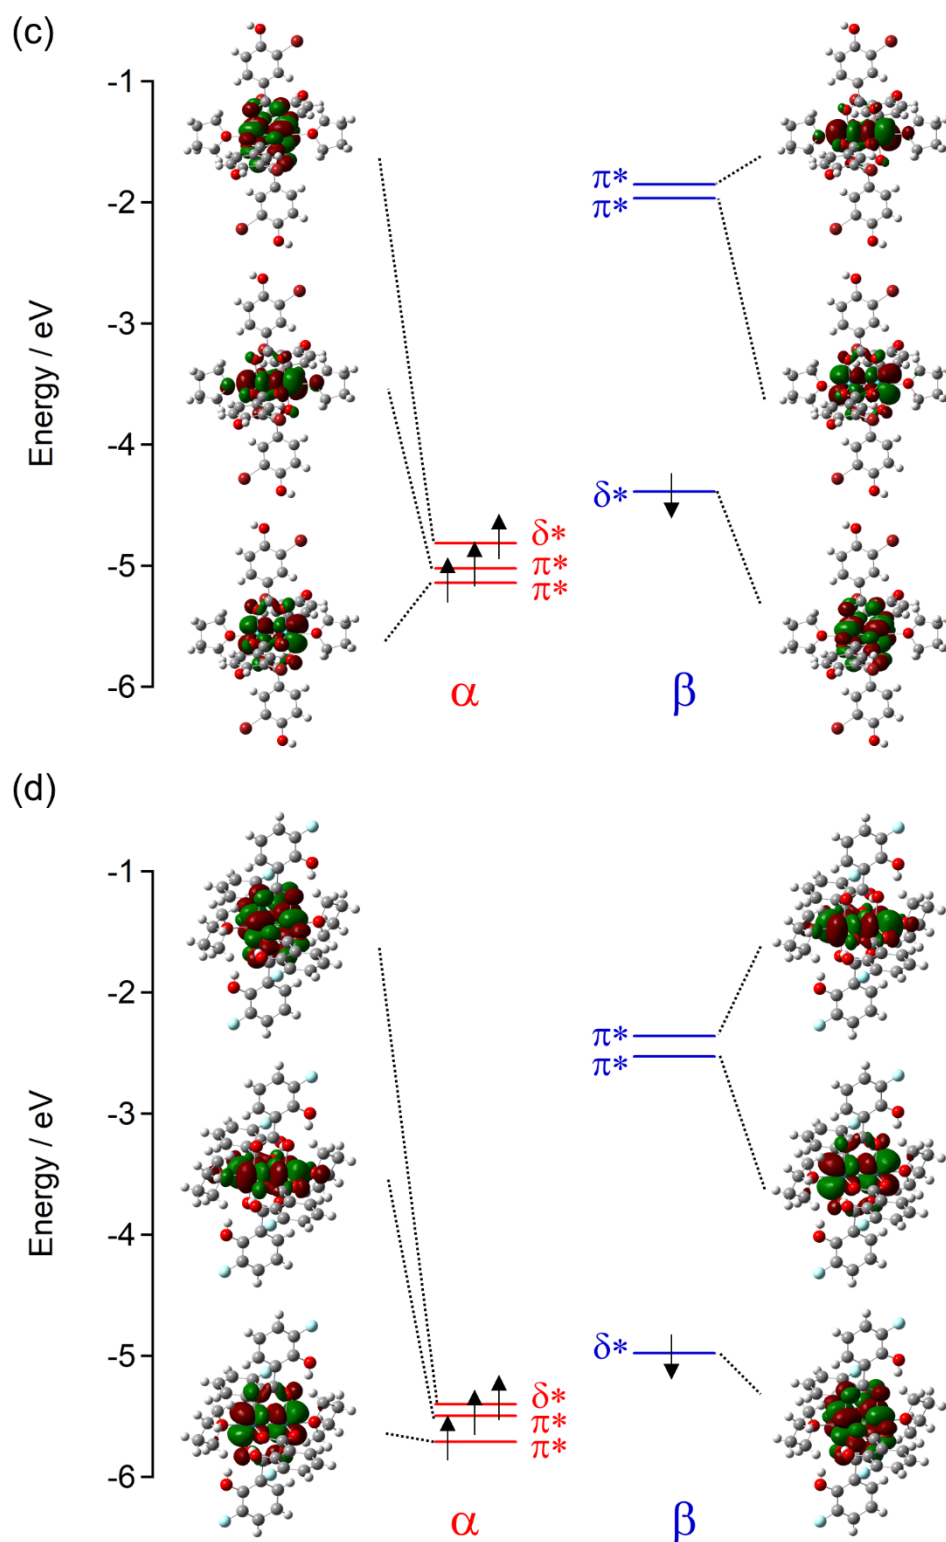

**Fig. S6 (continued).** Frontier orbitals associated with  $\pi^*$  and  $\delta^*$  orbitals for 3Br4OH (c) and 3F2OH (d), and their energy levels (eV), where  $\delta^*$  for  $\beta$  electron corresponds to HOMO level.

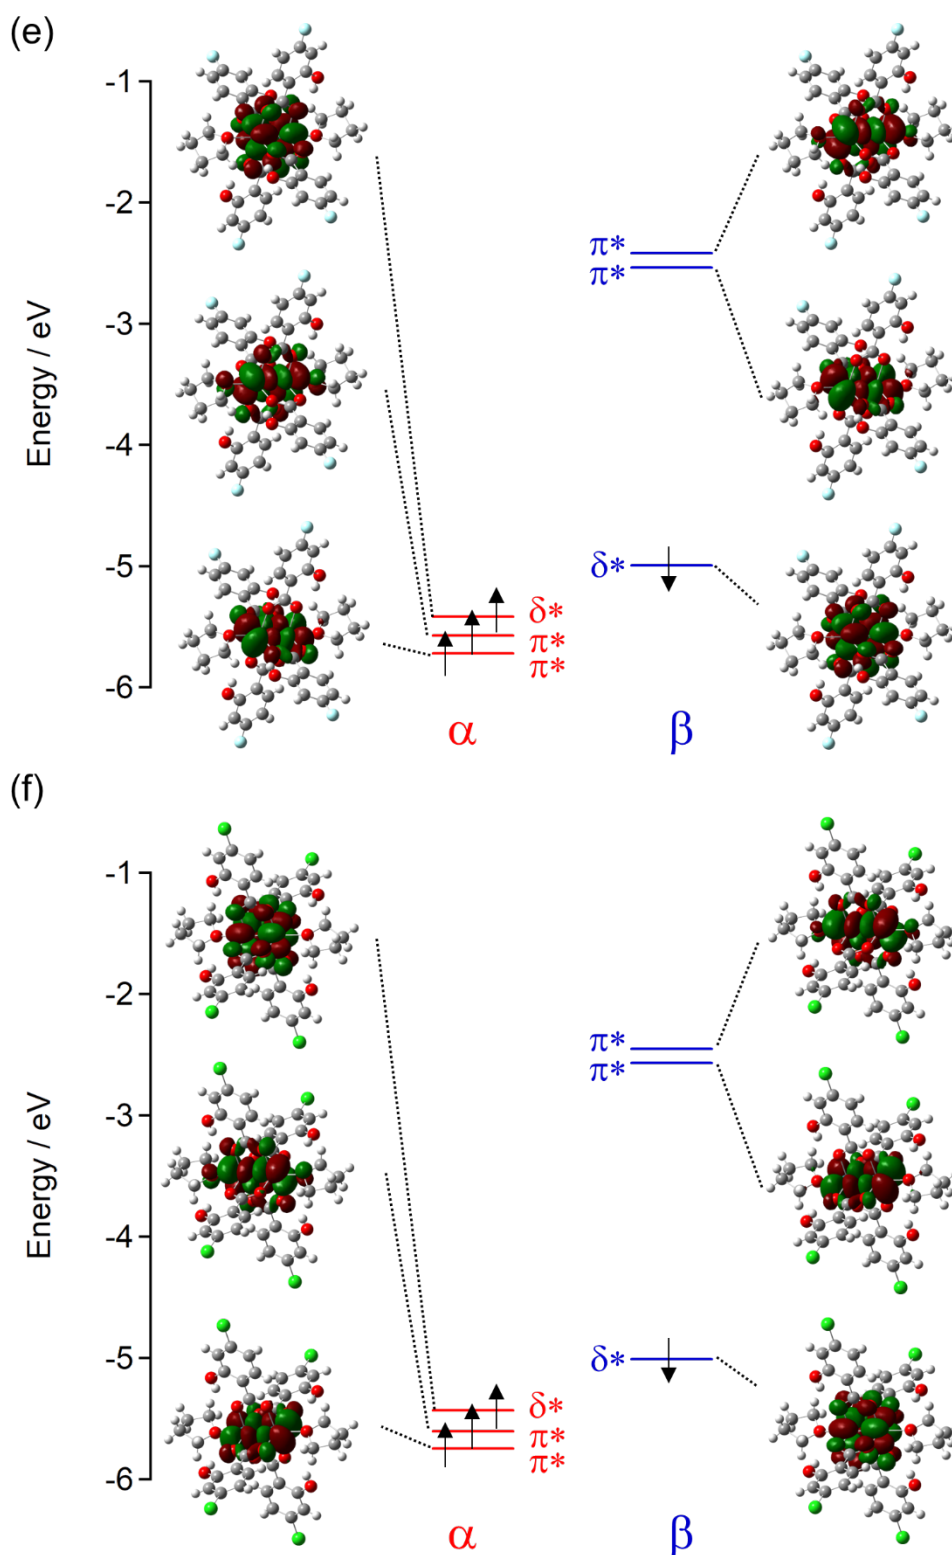

**Fig. S6 (continued).** Frontier orbitals associated with  $\pi^*$  and  $\delta^*$  orbitals for 4F2OH (e) and 4Cl2OH (f), and their energy levels (eV), where  $\delta^*$  for  $\beta$  electron corresponds to HOMO level.



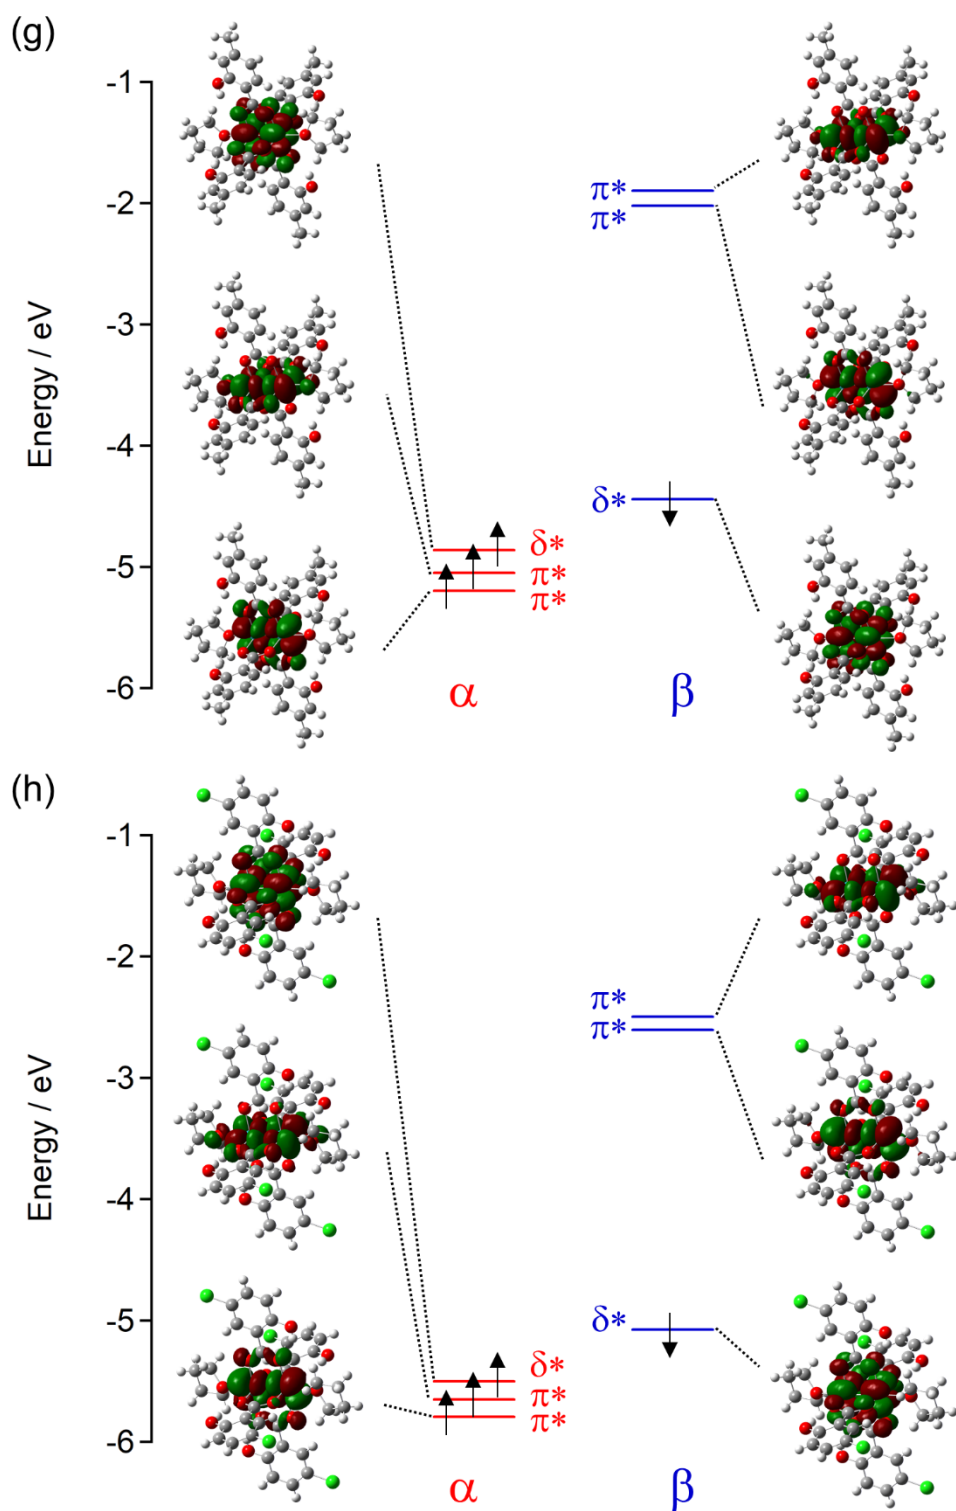

**Fig. S6 (continued).** Frontier orbitals associated with  $\pi^*$  and  $\delta^*$  orbitals for 4Me2OH (g) and 5Cl2OH (h), and their energy levels (eV), where  $\delta^*$  for  $\beta$  electron corresponds to HOMO level.

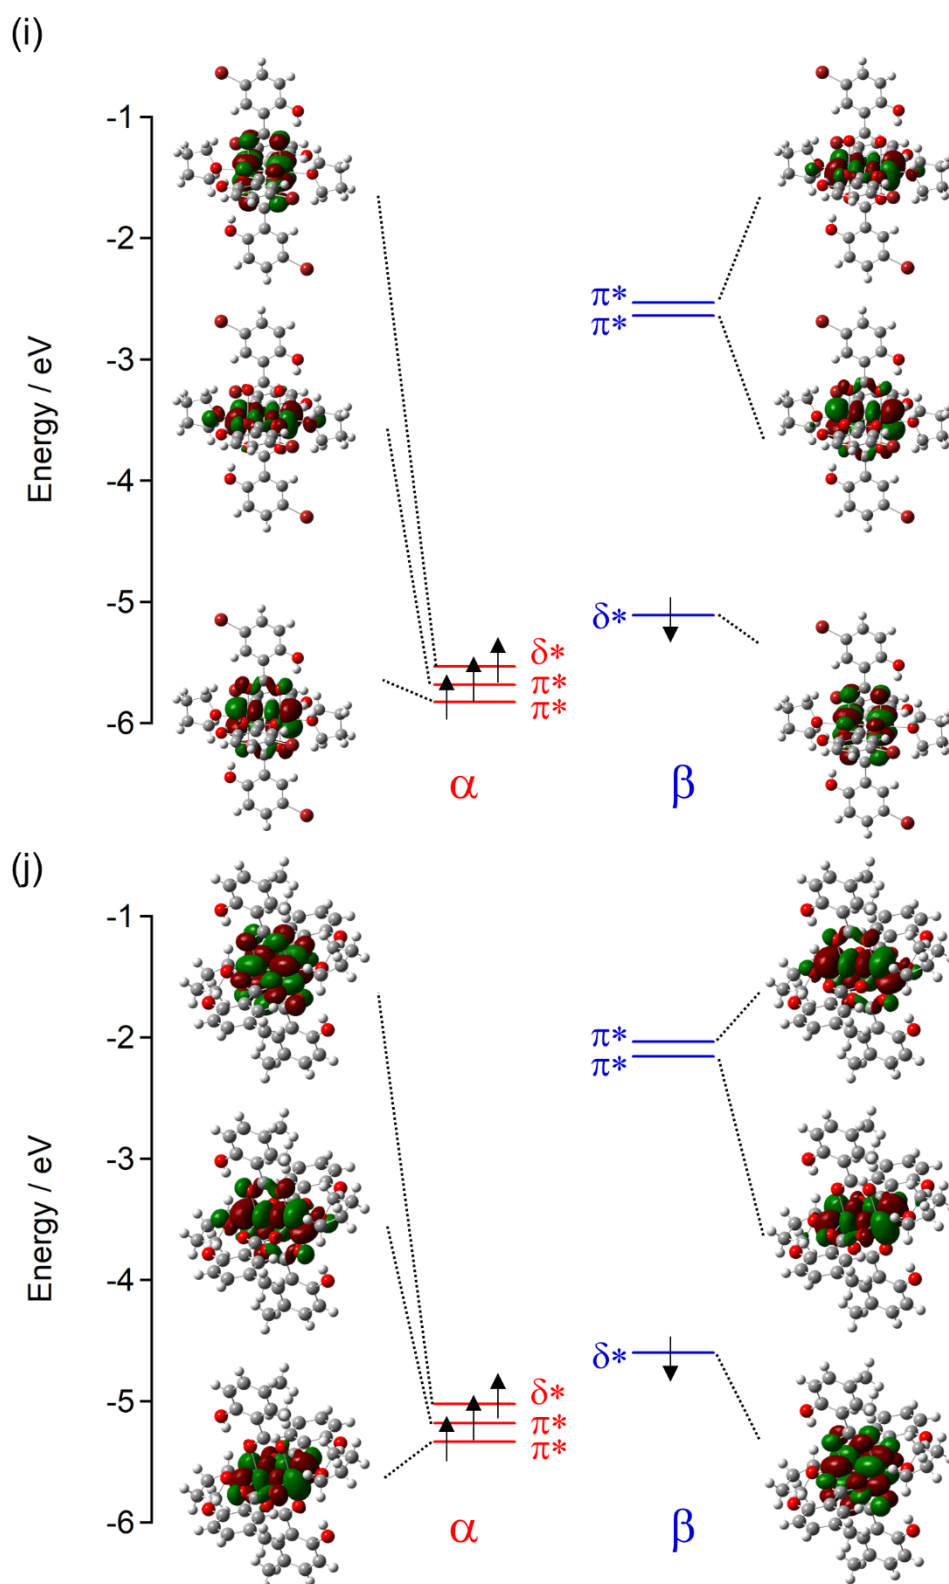

**Fig. S6 (continued).** Frontier orbitals associated with  $\pi^*$  and  $\delta^*$  orbitals for **5Br2OH** (i) and **5Me2OH** (j), and their energy levels (eV), where  $\delta^*$  for  $\beta$  electron corresponds to HOMO level.

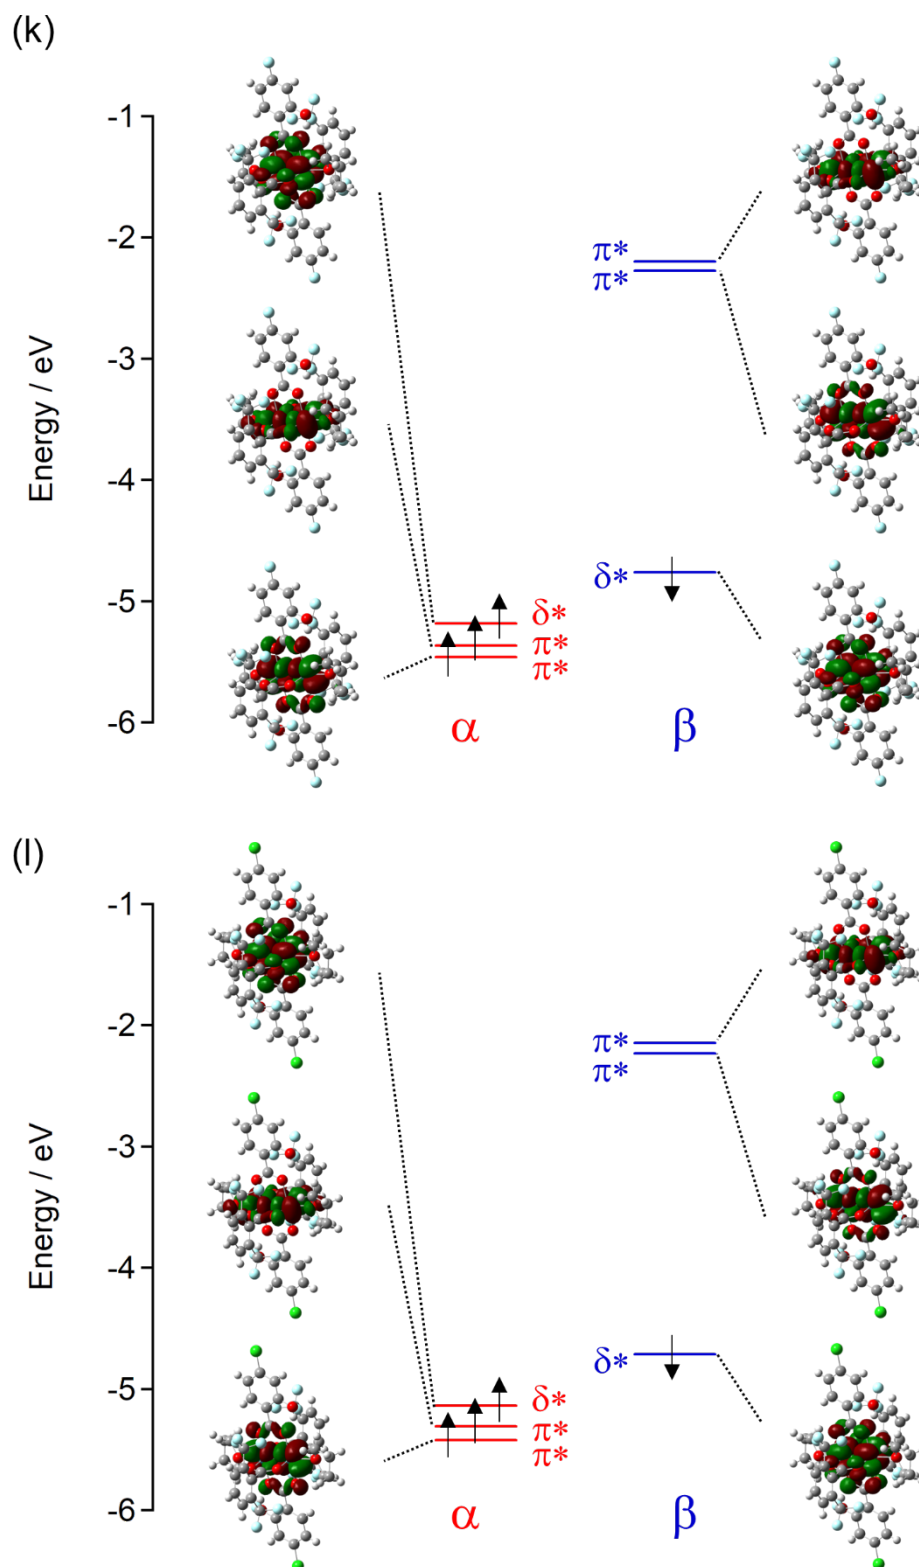

**Fig. S6 (continued).** Frontier orbitals associated with  $\pi^*$  and  $\delta^*$  orbitals for **ht-4F2OH** (k) and **ht-4Cl2OH** (l), and their energy levels (eV), where  $\delta^*$  for  $\beta$  electron corresponds to HOMO level.

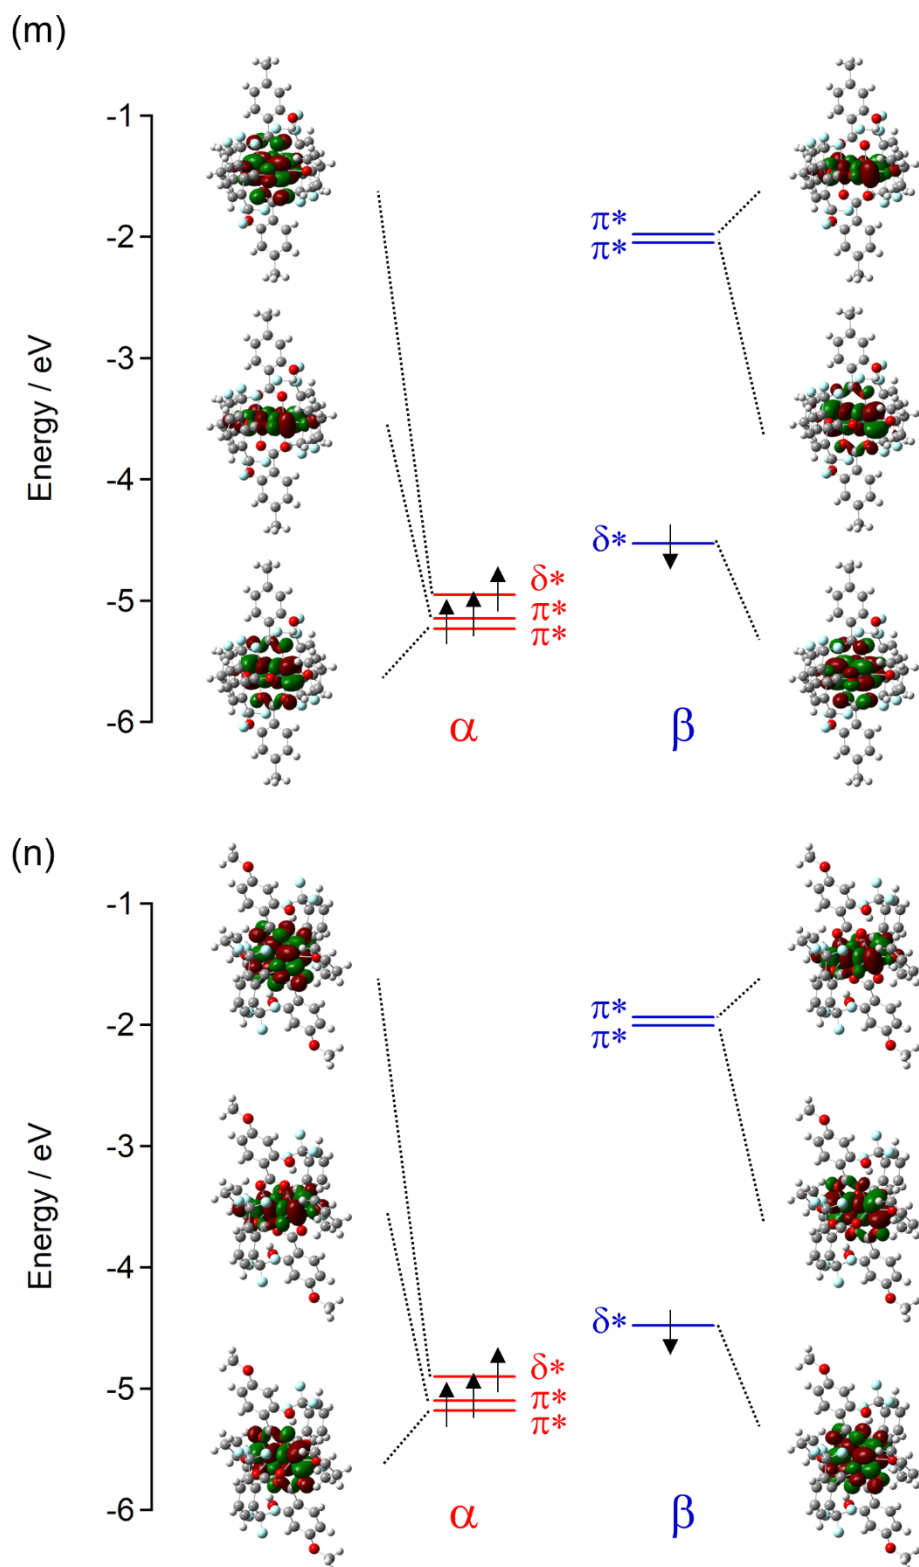

**Fig. S6 (continued).** Frontier orbitals associated with  $\pi^*$  and  $\delta^*$  orbitals for **ht-4Me2OH** (m) and **ht-4OMe2OH** (n), and their energy levels (eV), where  $\delta^*$  for  $\beta$  electron corresponds to HOMO level.

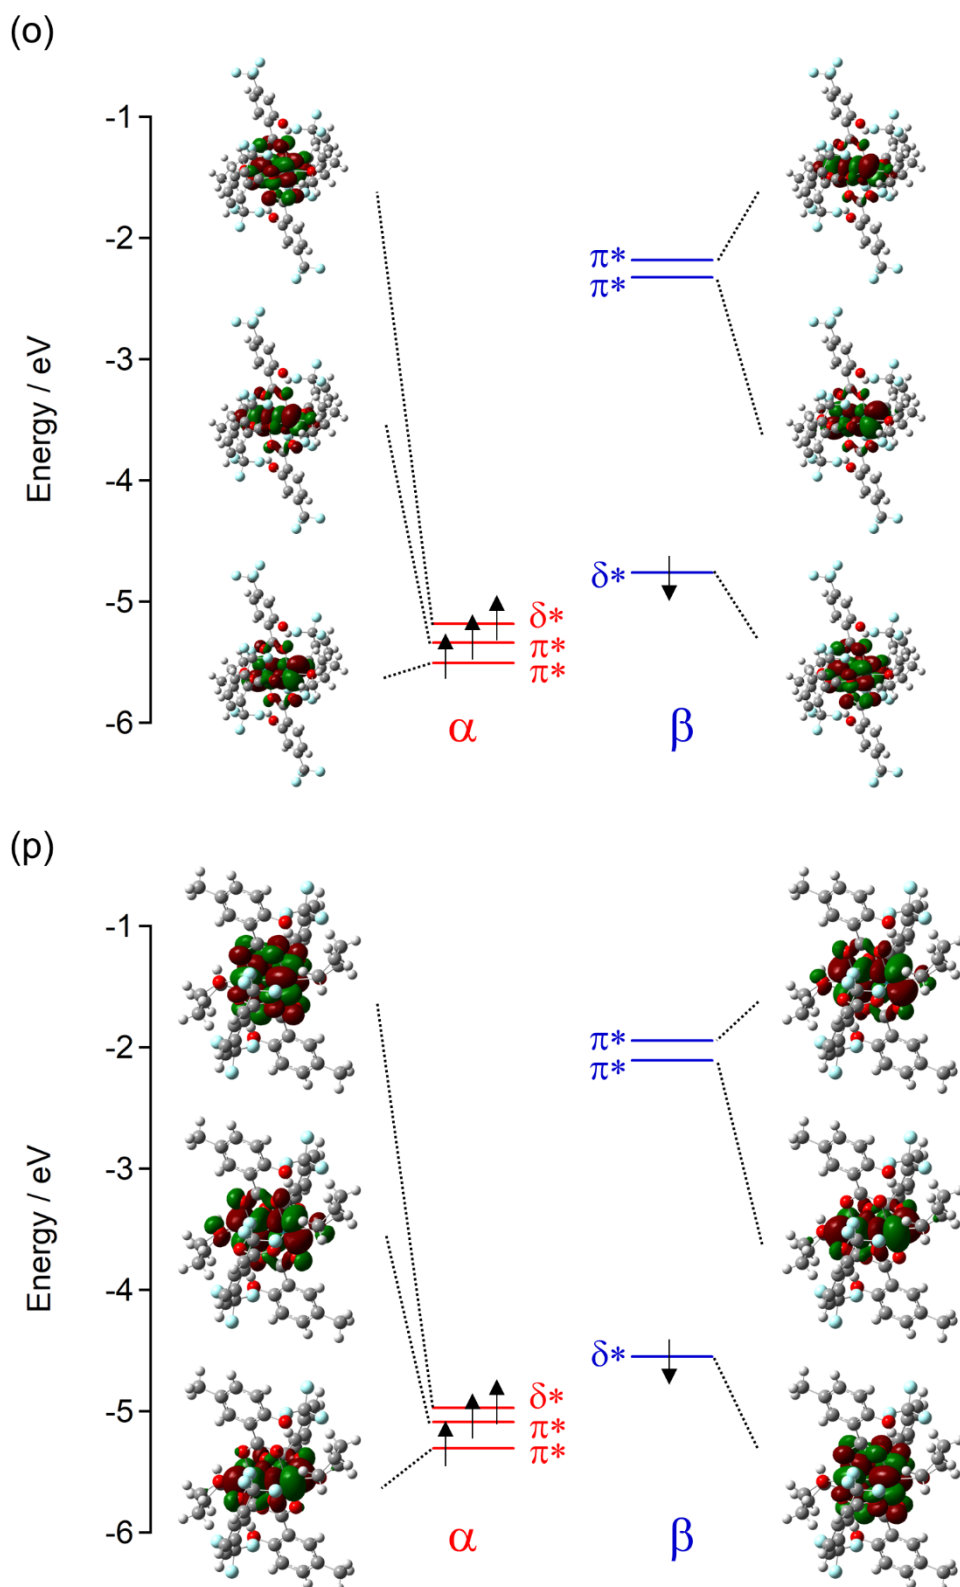

**Fig. S6 (continued).** Frontier orbitals associated with  $\pi^*$  and  $\delta^*$  orbitals for **ht-4CF<sub>3</sub>2OH** (o) and **ht-5Me<sub>2</sub>OH** (p), and their energy levels (eV), where  $\delta^*$  for  $\beta$  electron corresponds to HOMO level.

**Table S6.** Estimated energy levels (eV) of  $\pi^*$ - and  $\delta^*$ -characteristic orbitals of the heteroleptic  $[\text{Ru}_2^{\text{II,II}}]$  complexes obtained by DFT calculation for the hypothetical structural models without intramolecular hydrogen bond.

| <b>Electron character</b> | <b>Orbital character</b> | <b>3F2OH</b> | <b>4F2OH</b> | <b>4Cl2OH</b> | <b>4Me2OH</b> |
|---------------------------|--------------------------|--------------|--------------|---------------|---------------|
| $\beta$                   | $\pi^*$                  | -1.41472     | -1.45771     | -1.50561      | -0.999203     |
|                           | $\pi^*$                  | -1.58098     | -1.57418     | -1.62071      | -1.12519      |
|                           | $\delta^*$               | -3.99926     | -4.00334     | -4.03654      | -3.52061      |
| $\alpha$                  | $\delta^*$               | -4.42566     | -4.42947     | -4.46349      | -3.94538      |
|                           | $\pi^*$                  | -4.54893     | -4.60934     | -4.65152      | -4.14538      |
|                           | $\pi^*$                  | -4.74676     | -4.74594     | -4.78730      | -4.28824      |

  

| <b>Electron character</b> | <b>Orbital character</b> | <b>5Cl2OH</b> | <b>5Br2OH</b> | <b>5Me2OH</b> |
|---------------------------|--------------------------|---------------|---------------|---------------|
| $\beta$                   | $\pi^*$                  | -1.53581      | -1.57608      | -1.00655      |
|                           | $\pi^*$                  | -1.64738      | -1.68683      | -1.1241       |
|                           | $\delta^*$               | -4.08688      | -4.12579      | -3.53857      |
| $\alpha$                  | $\delta^*$               | -4.51464      | -4.55328      | -3.96497      |
|                           | $\pi^*$                  | -4.68526      | -4.72635      | -4.14756      |
|                           | $\pi^*$                  | -4.82132      | -4.85968      | -4.28498      |

  

| <b>Electron character</b> | <b>Orbital character</b> | <b>ht-4F2OH</b> | <b>ht-4Cl2OH</b> | <b>ht-4Me2OH</b> | <b>ht-4OMe2OH</b> |
|---------------------------|--------------------------|-----------------|------------------|------------------|-------------------|
| $\beta$                   | $\pi^*$                  | -1.72194        | -1.67894         | -1.51078         | -1.47894          |
|                           | $\pi^*$                  | -1.75296        | -1.72085         | -1.53935         | -1.50234          |
|                           | $\delta^*$               | -4.24416        | -4.21042         | -4.02429         | -3.98402          |
| $\alpha$                  | $\delta^*$               | -4.66703        | -4.63356         | -4.44634         | -4.40471          |
|                           | $\pi^*$                  | -4.88989        | -4.84472         | -4.67927         | -4.64907          |
|                           | $\pi^*$                  | -4.92309        | -4.89234         | -4.70812         | -4.65560          |

  

| <b>Electron character</b> | <b>Orbital character</b> | <b>ht-4CF<sub>3</sub>2OH</b> | <b>ht-5Me2OH</b> |
|---------------------------|--------------------------|------------------------------|------------------|
| $\beta$                   | $\pi^*$                  | -1.74044                     | -1.54996         |
|                           | $\pi^*$                  | -1.89609                     | -1.67405         |
|                           | $\delta^*$               | -4.31301                     | -4.07736         |
| $\alpha$                  | $\delta^*$               | -4.73805                     | -4.49995         |
|                           | $\pi^*$                  | -4.89179                     | -4.60226         |
|                           | $\pi^*$                  | -5.07139                     | -4.87030         |

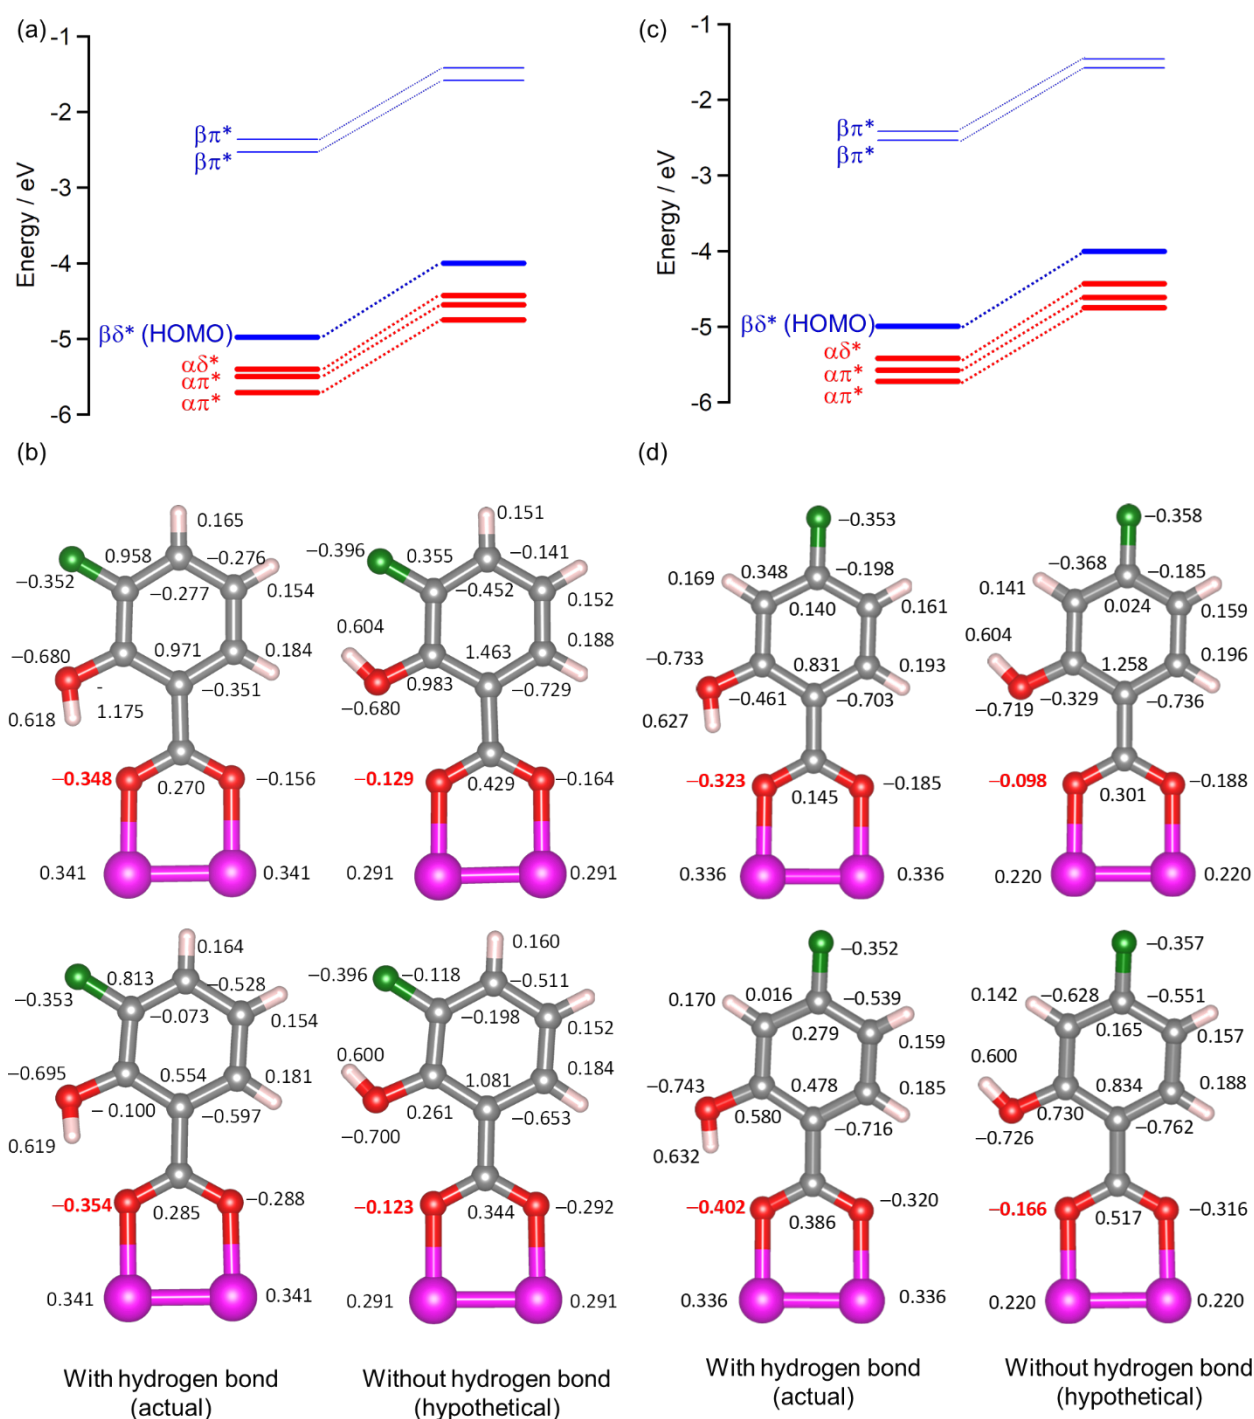

**Fig. S7.** Energy diagrams of frontier orbitals associated with  $\pi^*$  and  $\delta^*$  orbitals for **3F2OH** (a) and **4F2OH** (c) obtained by DFT calculation for the structural models with (left) or without (right) intra-molecular hydrogen bond; a part of a structural model of **3F2OH** (b) and **4F2OH** (d) subjected to DFT calculation; actual (left) or hypothetical (right) crystal structure with or without intra-molecular hydrogen bond, respectively. The attached digits indicate the value of the Mulliken charge.<sup>11</sup> Another bridging benzoate ligands and THF molecules at the axial position are omitted for clarity.



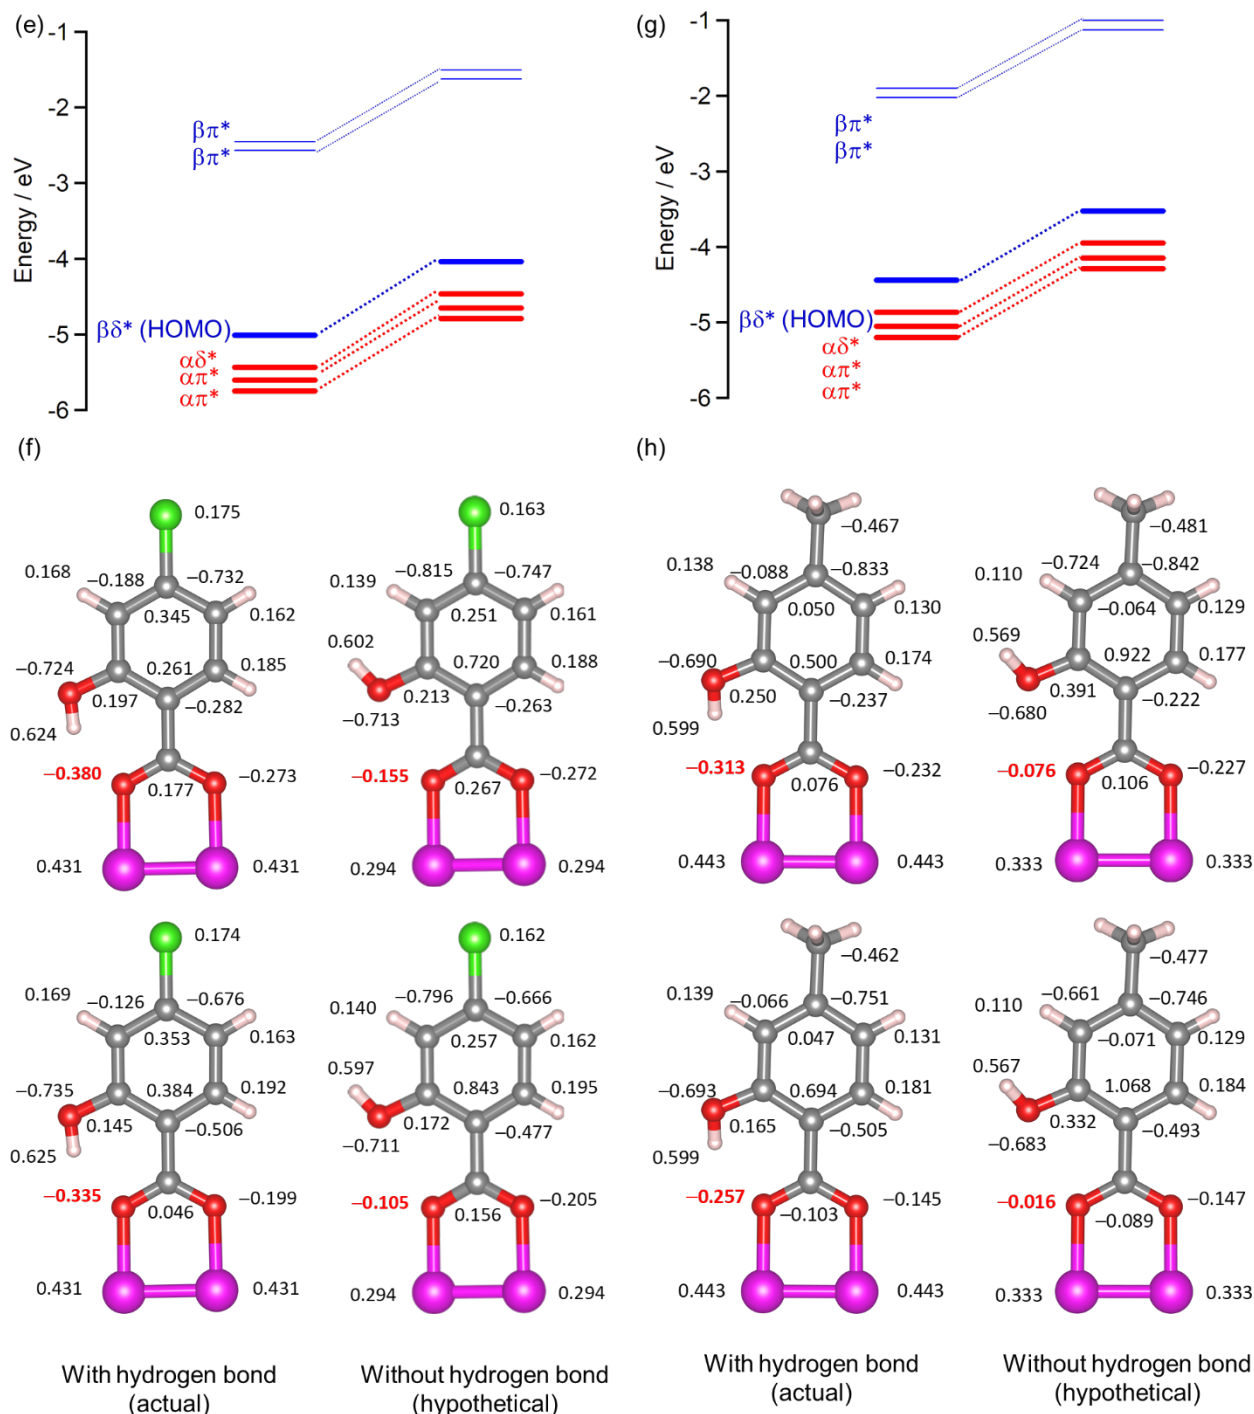

**Fig. S7 (continued).** Energy diagrams of frontier orbitals associated with  $\pi^*$  and  $\delta^*$  orbitals for 4Cl<sub>2</sub>OH (e) and 4Me<sub>2</sub>OH (g) obtained by DFT calculation for the structural models with (left) or without (right) intra-molecular hydrogen bond; a part of a structural model of 4Cl<sub>2</sub>OH (f) and 4Me<sub>2</sub>OH (h) subjected to DFT calculation; actual (left) or hypothetical (right) crystal structure with or without intra-molecular hydrogen bond, respectively. The attached digits indicate the value of the Mulliken charge.<sup>11</sup> Those for hydrogen on sp<sup>3</sup> carbon were omitted for clarity in Fig. S6h. Another bridging benzoate ligands and THF molecules at the axial position are omitted for clarity.



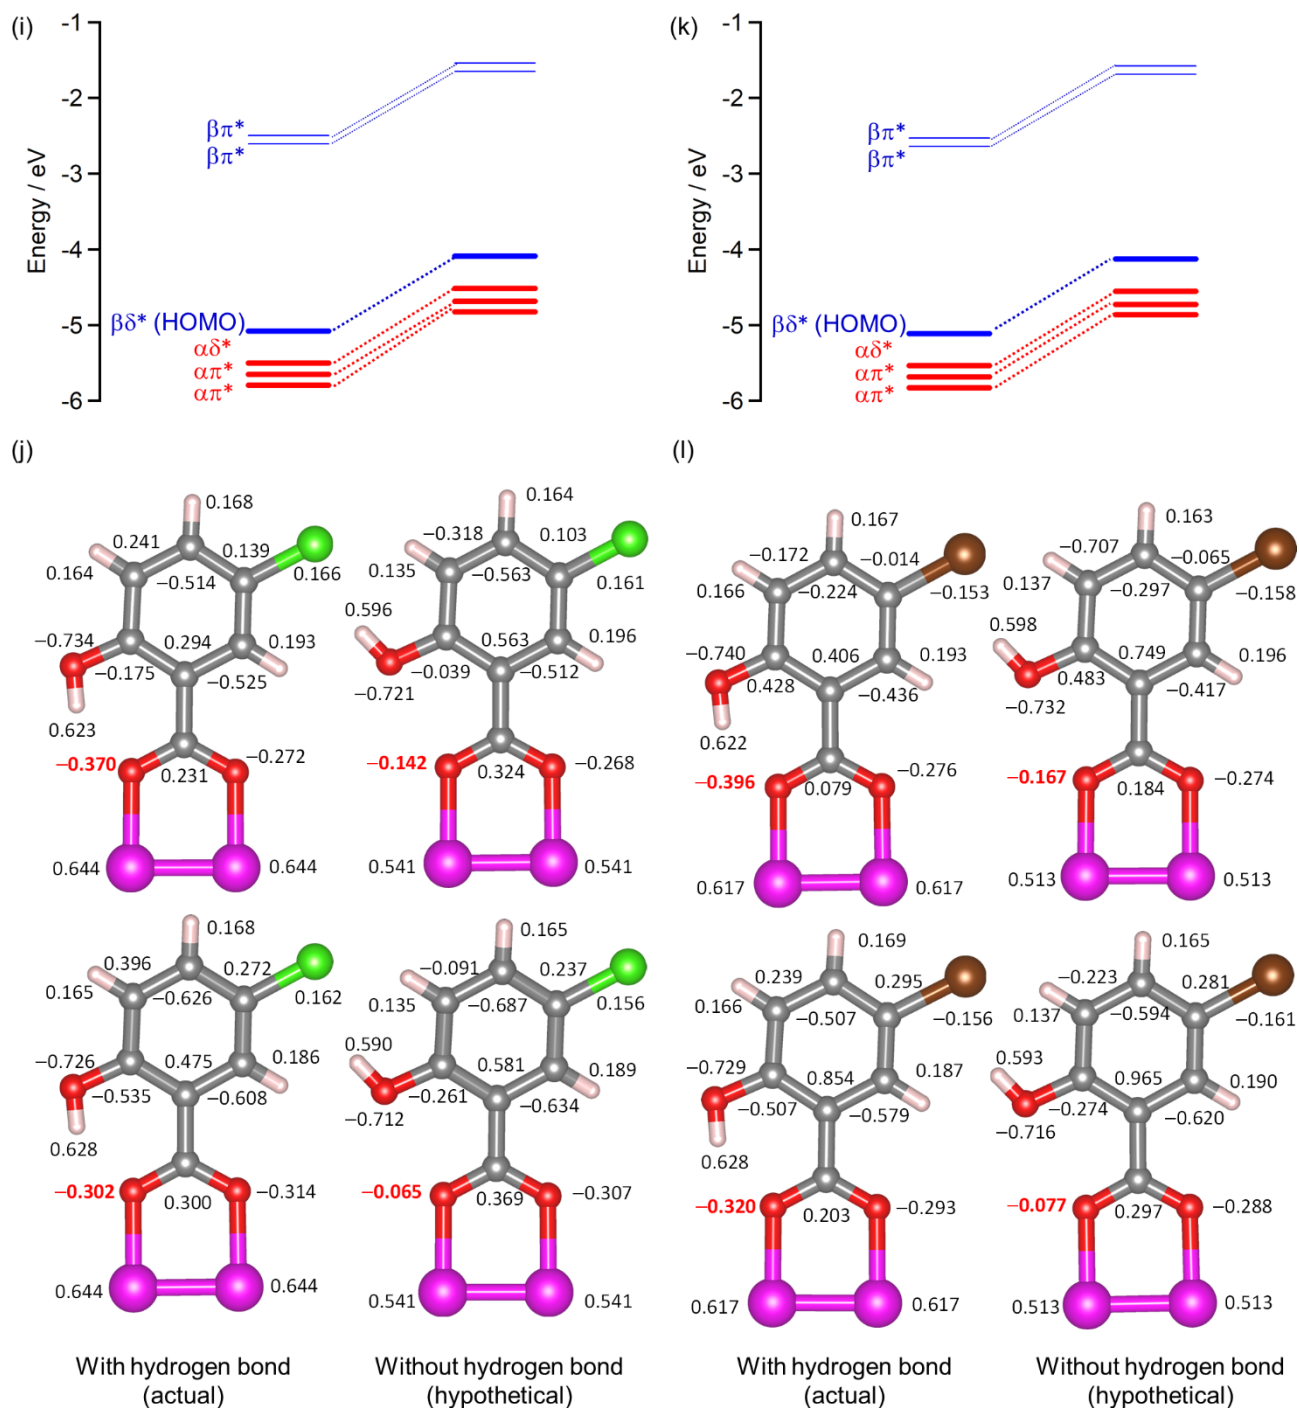

**Fig. S7 (continued).** Energy diagrams of frontier orbitals associated with  $\pi^*$  and  $\delta^*$  orbitals for **5Cl<sub>2</sub>OH** (i) and **5Br<sub>2</sub>OH** (k) obtained by DFT calculation for the structural models with (left) or without (right) intra-molecular hydrogen bond; a part of a structural model of **5Cl<sub>2</sub>OH** (j) and **5Br<sub>2</sub>OH** (l) subjected to DFT calculation; actual (left) or hypothetical (right) crystal structure with or without intra-molecular hydrogen bond, respectively. The attached digits indicate the value of the Mulliken charge.<sup>11</sup> Another bridging benzoate ligands and THF molecules at the axial position are omitted for clarity.

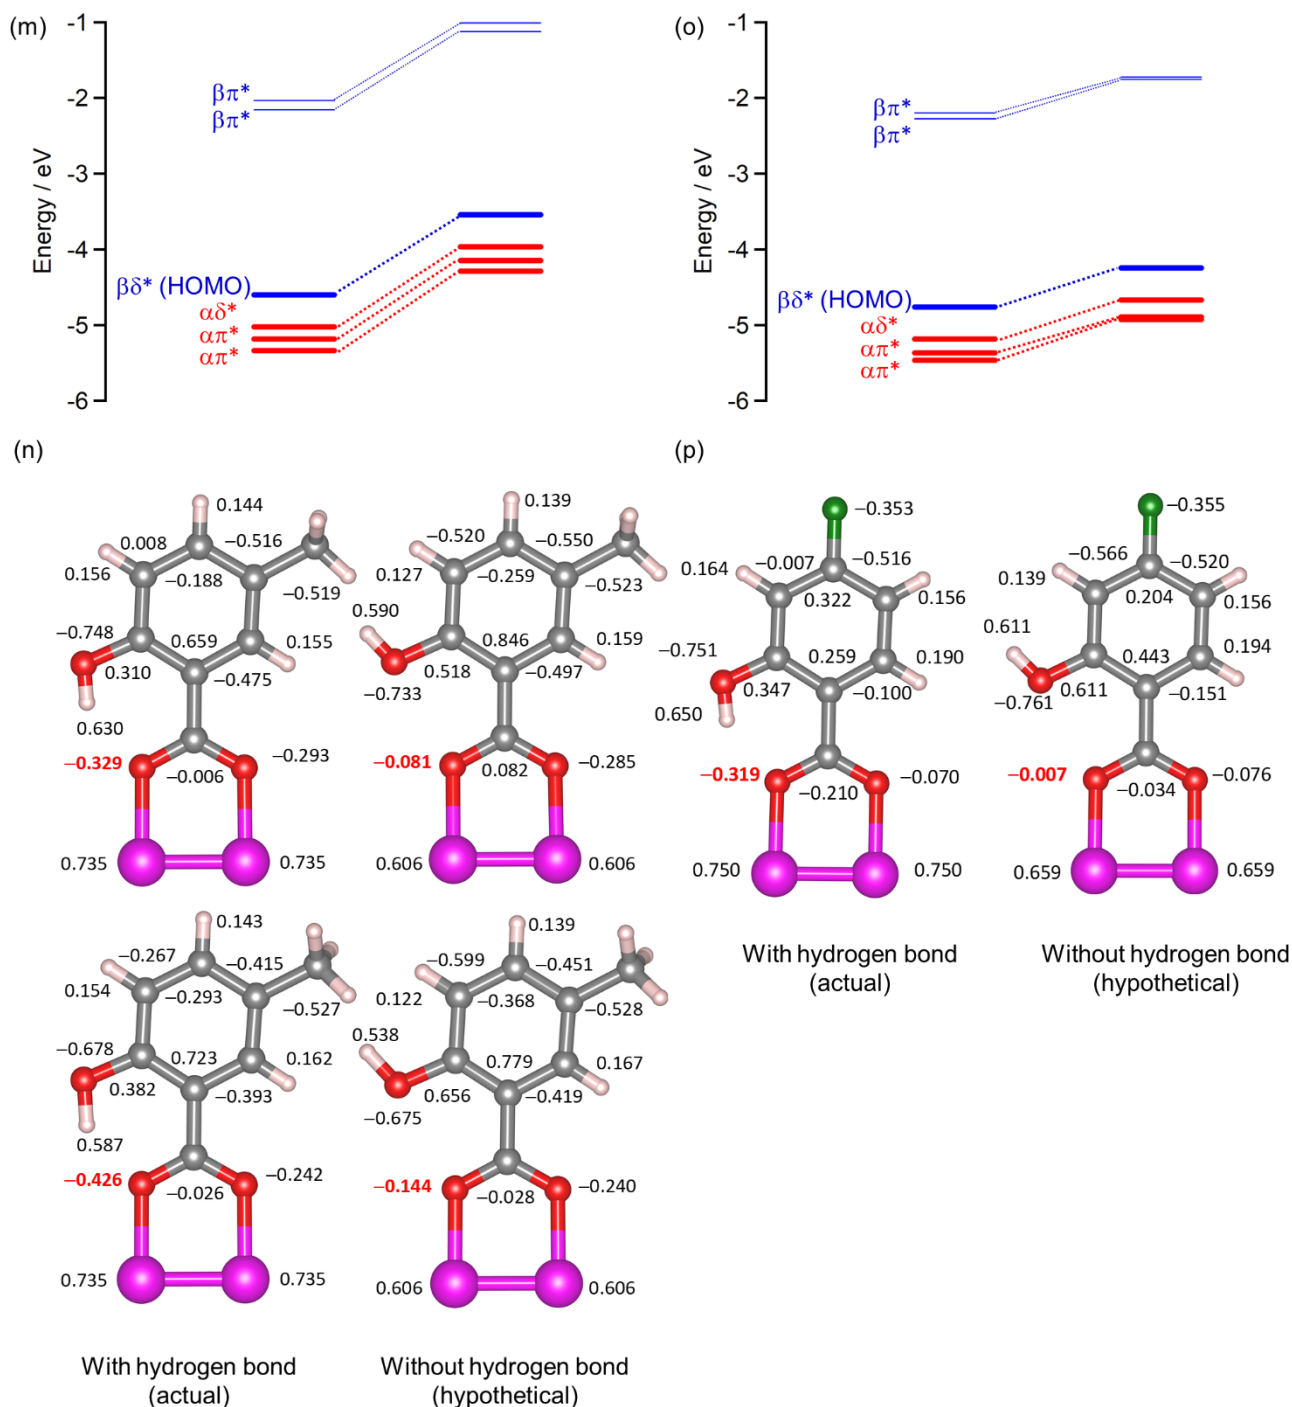

**Fig. S7 (continued).** Energy diagrams of frontier orbitals associated with  $\pi^*$  and  $\delta^*$  orbitals for **5Me2OH** (m) and **ht-4F2OH** (o) obtained by DFT calculation for the structural models with (left) or without (right) intra-molecular hydrogen bond; a part of a structural model of **5Me2OH** (n) and **ht-4F2OH** (p) subjected to DFT calculation; actual (left) or hypothetical (right) crystal structure with or without intra-molecular hydrogen bond, respectively. The attached digits indicate the value of the Mulliken charge.<sup>11</sup> Those for hydrogen on  $sp^3$  carbon were omitted for clarity in Fig. S6n. Another bridging benzoate ligands and THF molecules at the axial position are omitted for clarity.

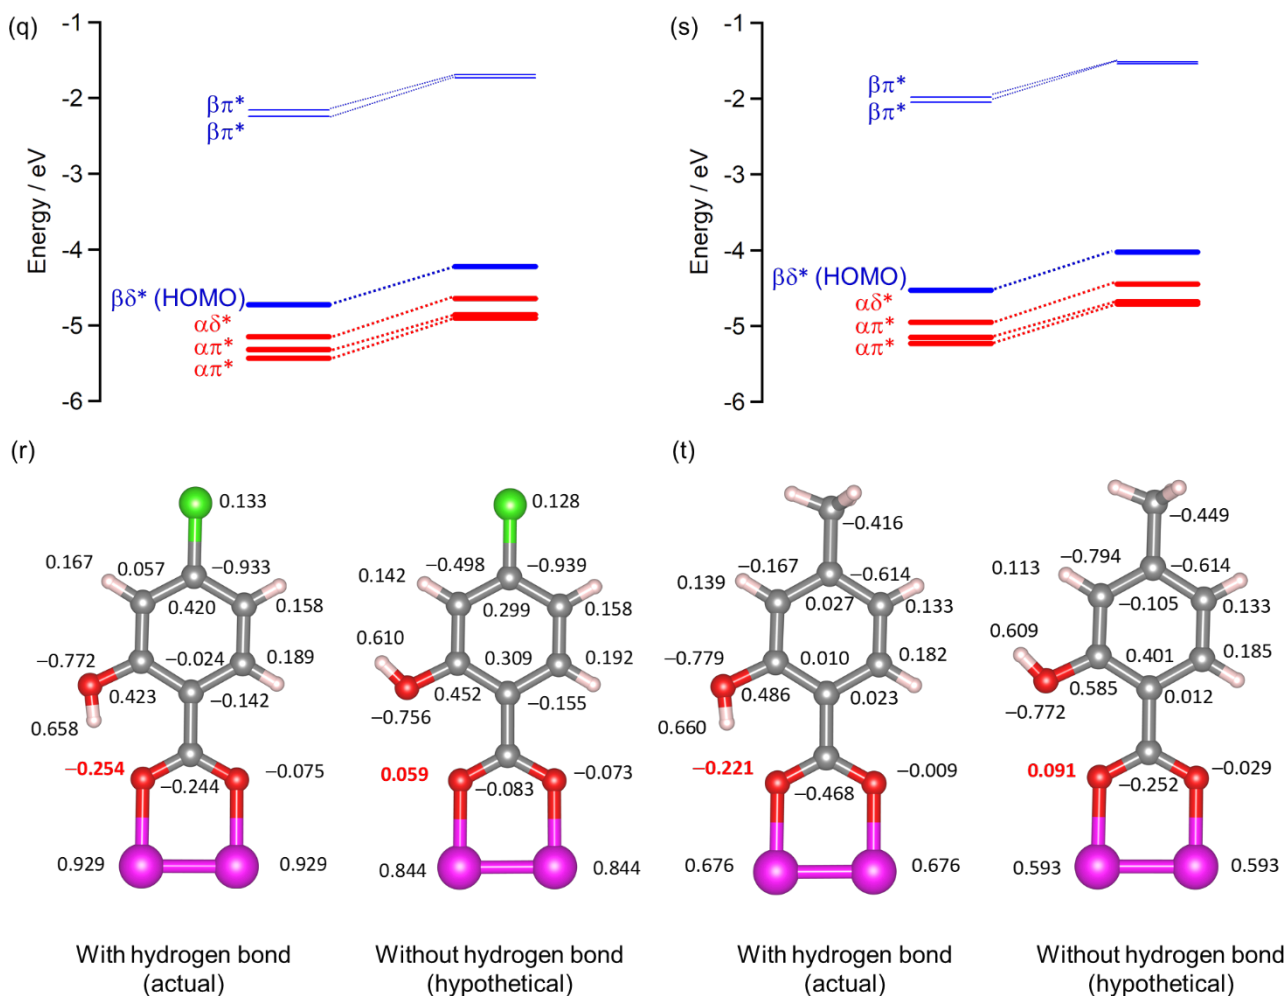

**Fig. S7 (continued).** Energy diagrams of frontier orbitals associated with  $\pi^*$  and  $\delta^*$  orbitals for **ht-4Cl<sub>2</sub>OH** (q) and **ht-4Me<sub>2</sub>OH** (s) obtained by DFT calculation for the structural models with (left) or without (right) intra-molecular hydrogen bond; a part of a structural model of **ht-4Cl<sub>2</sub>OH** (r) and **ht-4Me<sub>2</sub>OH** (t) subjected to DFT calculation; actual (left) or hypothetical (right) crystal structure with or without intra-molecular hydrogen bond, respectively. The attached digits indicate the value of the Mulliken charge.<sup>11</sup> Those for hydrogen on  $sp^3$  carbon were omitted for clarity in Fig. S6t. Another bridging benzoate ligands and THF molecules at the axial position are omitted for clarity.

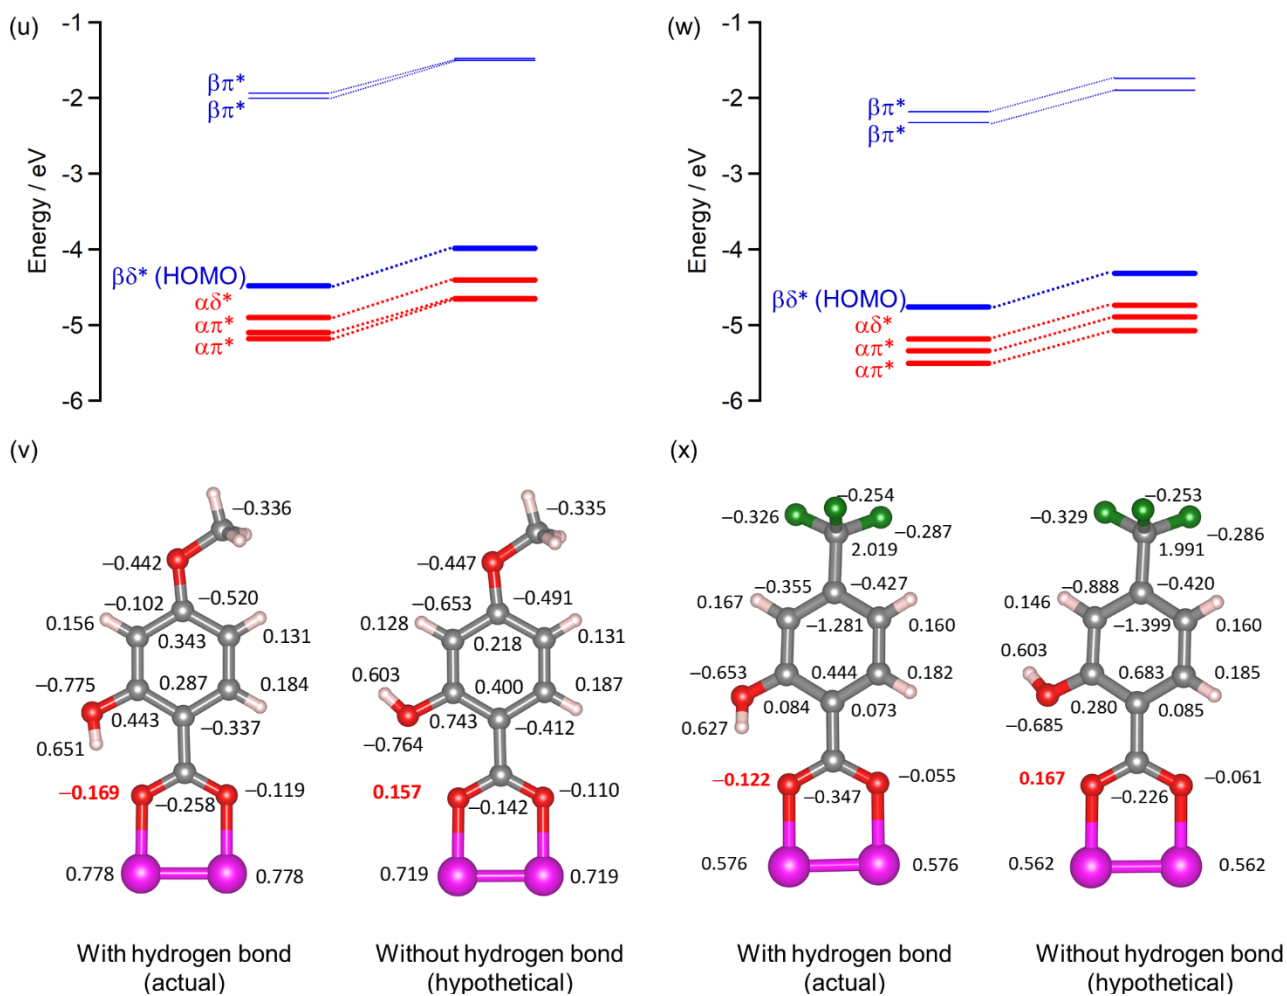

**Fig. S7 (continued).** Energy diagrams of frontier orbitals associated with  $\pi^*$  and  $\delta^*$  orbitals for **ht-4OMe2OH** (u) and **ht-4CF<sub>3</sub>2OH** (w) obtained by DFT calculation for the structural models with (left) or without (right) intra-molecular hydrogen bond; a part of a structural model of **ht-4OMe2OH** (v) and **ht-4CF<sub>3</sub>2OH** (x) subjected to DFT calculation; actual (left) or hypothetical (right) crystal structure with or without intra-molecular hydrogen bond, respectively. The attached digits indicate the value of the Mulliken charge.<sup>11</sup> Those for hydrogen on  $sp^3$  carbon were omitted for clarity in Fig. S6v. Another bridging benzoate ligands and THF molecules at the axial position are omitted for clarity.

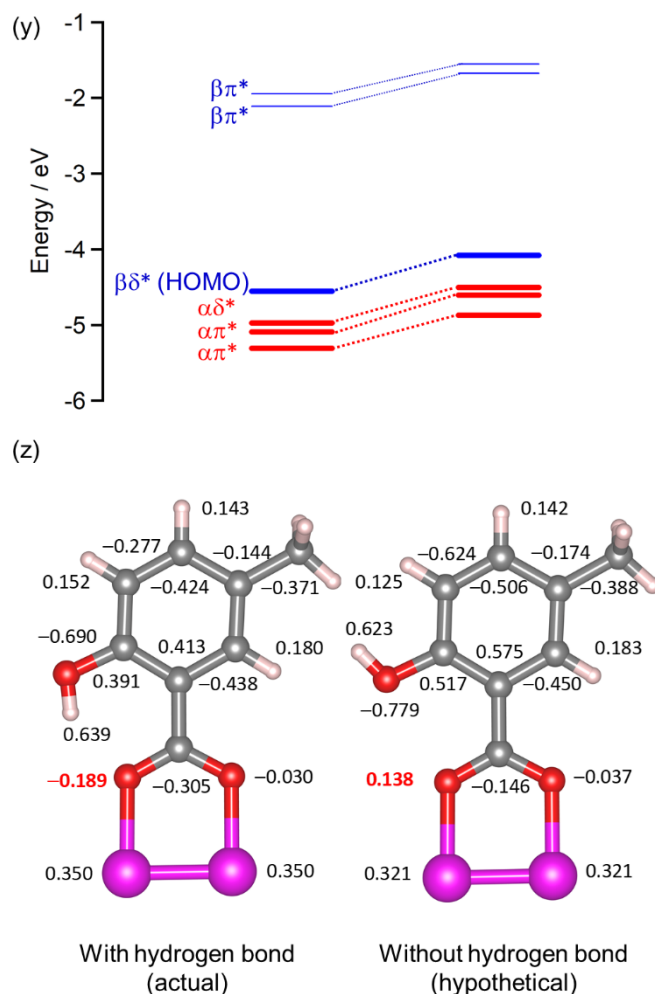

**Fig. S7 (continued).** Energy diagrams of frontier orbitals associated with  $\pi^*$  and  $\delta^*$  orbitals for **ht-5Me2OH** (y) obtained by DFT calculation for the structural models with (left) or without (right) intra-molecular hydrogen bond; a part of a structural model of **ht-5Me2OH** (z) subjected to DFT calculation; actual (left) or hypothetical (right) crystal structure with or without intra-molecular hydrogen bond, respectively. The attached digits indicate the value of the Mulliken charge.<sup>11</sup> Those for hydrogen on  $sp^3$  carbon were omitted for clarity in Fig. S6z. Another bridging benzoate ligands and THF molecules at the axial position are omitted for clarity.

## References for SI

---

- 1 W. Kosaka, M. Itoh and H. Miyasaka, *Dalton Trans.*, 2015, **44**, 8156–8168.
- 2 W. Kosaka, Y. Watanabe, K. H. Aliyah and H. Miyasaka, *Dalton Trans.*, 2022, **51**, 85–94.
- 3 W. Kosaka, T. Morita, T. Yokoyama, J. Zhang and H. Miyasaka, *Inorg. Chem.*, 2015, **54**, 1518–1527.
- 4 W. Kosaka, K. Yamagishi, A. Hori, H. Sato, R. Matsuda, S. Kitagawa, M. Takata and H. Miyasaka, *J. Am. Chem. Soc.*, 2013, **135**, 18469–18480.
- 5 H. Miyasaka, N. Motokawa, R. Atsuumi, H. Kamo, Y. Asai and M. Yamashita, *Dalton Trans.*, 2011, **40**, 673–682.
- 6 Y. Sekine, K. H. Aliyah, T. Shimada, J. Zhang, W. Kosaka and H. Miyasaka, *Chem. Lett.*, 2018, **47**, 693–696.
- 7 C. Itoh, H. Yoshino, T. Kitayama, W. Kosaka and H. Miyasaka, *Dalton Trans.*, 2024, **53**, 444–448.
- 8 J. Zhang, W. Kosaka, S. Kitagawa, M. Takata and H. Miyasaka, *Chem. –Eur. J.*, 2019, **25**, 3020–3031.
- 9 D. H. McDaniel and H. C. Brown, *J. Org. Chem.*, 1958, **23**, 420–427.
- 10 Y. Sekine, W. Kosaka, H. Kano, C. Dou, T. Yokoyama and H. Miyasaka, *Dalton Trans.*, 2016, **45**, 7427–7434.
- 11 R. S. Mulliken, *J. Chem. Phys.*, 1952, **23**, 1833–1840.
